# Supplementary material for: [Fe(bpy)3]2+-based porous organic polymers with boosted photocatalytic activity for recyclable organic transformations
Source: Royal Society of Chemistry journal article supplement (doi:10.1039/d0ta12267j), 2021-01-01
Supplement: d0ta12267j1.pdf [file d0ta12267j1.pdf]

**General methods.** Commercial reactants were used without further purification. Solvents were dried according to standard methods.  $^1\text{H}$  NMR spectra were recorded by Bruker AVANCE III HD 400 MHz instrument, and were internally referenced to residual solvent signals ( $^1\text{H}$  NMR:  $\text{CDCl}_3$  and  $\text{DMSO-}d_6$  referenced at 7.26 and 2.54 ppm, respectively;  $^{13}\text{C}$  NMR:  $\text{DMSO-}d_6$  referenced at 40.45 ppm). Gas chromatography was conducted on an Agilent 6890. Single crystal X-ray diffraction was recorded on a Bruker SMART CCD diffractometer. UV-visible spectra were recorded with a PerkinElmer Lambda 365 UV-Visible spectrometer. Fluorescence spectra were recorded with a PerkinElmer LS-55 fluorescence spectrometer. Fourier Transform Infrared spectra were recorded with a ThermoFisher Nicolet iS10 FT-IR spectrometer. Thermogravimetric analysis (TGA) profiles were recorded on a TGA 8000 thermogravimetric analyzer. Nitrogen adsorption experiments were recorded on a Micromeritics Tristar II 3020 analyzer. X-ray photoelectron spectra (XPS) were recorded on a PHI 5000C&PHI5300 spectrometer. Scanning electron microscopic (SEM) images were obtained on a Phenom Prox microscope. Energy dispersive spectra (EDS) were obtained on a Tecnai G2 F20 S-Twin microscope. ICP-AES analysis were obtained on a PE-8000 inductively coupled plasma emission spectrometer. The crystal data of complex **2a** has been deposited in Cambridge Crystallographic Data Centre (CCDC deposit no. 2040861).

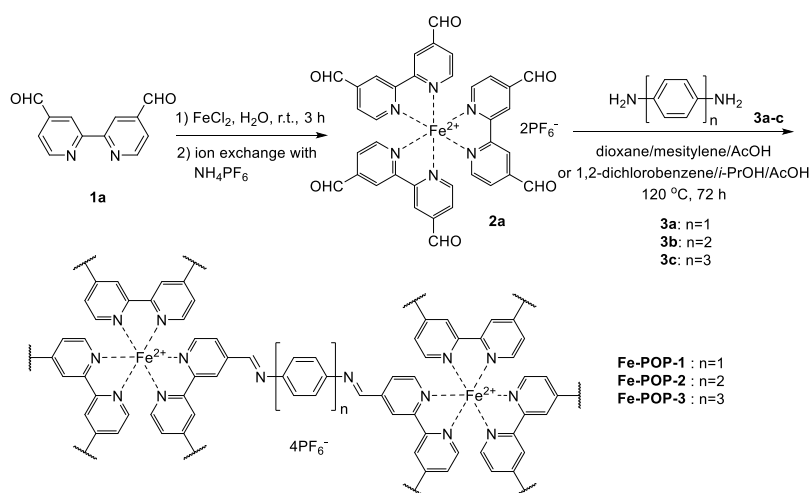

**Compound 2a.** Compound **1a** (636.6 mg, 3.0 mmol) and ferrous chloride (126.7 mg, 1.0 mmol) were dissolved in deionized water (15 mL). The mixture was stirred for 3 h at room temperature. Saturated aqueous solution of  $\text{NH}_4\text{PF}_6$  was added dropwise to the mixture till no more precipitate formed. The precipitate was filtered to afford the crude product, which was dissolved in  $\text{CH}_3\text{CN}$  to prepare a saturated solution. Ethyl ether was added dropwise to the solution, and the precipitate formed was filtrated and washed with cold diethyl ether to give **2a** as a bronze solid (834 mg, 85%).  $^1\text{H}$  NMR (400 MHz,  $\text{DMSO-}d_6$ ):  $\delta$  10.25 (s, 6H), 9.06 (s, 6H), 8.86 (s, 6H), 7.96 (s, 6H).  $^{13}\text{C}$  NMR (100 MHz,  $\text{DMSO-}d_6$ ):  $\delta$  193.97, 156.51, 151.73, 143.49, 123.36, 120.04. FT-IR (KBr) 1707, 1617, 1559, 1478, 1416, 1390, 1380, 1314, 1232, 1198, 1181, 843  $\text{cm}^{-1}$ . The structure of **2a** was further confirmed by its X-ray crystal structure (CCDC deposit no. 2040861). The single crystals were grown by evaporating the solution in acetonitrile.

**Fe-POP-1.** Compounds **2a** (32.7 mg, 0.033 mmol) and **3a** (10.8 mg, 0.1 mmol) were dissolved in a mixture of 1,4-dioxane/mesitylene (19/1, v/v) (2 mL) and aqueous acetic acid (6 M, 0.2 mL) in a 10 mL Schlenk tube. The tube was sealed after being degassed in a liquid nitrogen

bath for 10 min and then kept at 120 °C for 72 h to yield a dark purple solid at the bottom of the tube. After cooling to room temperature, the precipitate was filtered and washed with DMSO and further extracted with THF in a Soxhlet extractor. After being dried under vacuum at 40 °C for 12 h, the POP was obtained as a dark purple powder (30.7 mg, 77%), which was insoluble in common solvents including water, DMSO, DMF, acetone or acetonitrile.

**Fe-POP-2.** Compounds **2a** (32.7 mg, 0.033 mmol) and **3b** (18.4 mg, 0.1 mmol) were dissolved in a mixture of 1,4-dioxane/mesitylene (3/1, v/v) (2 mL) and aqueous acetic acid (6 M, 0.2 mL) in a 10 mL Schlenk tube. The tube was sealed after being degassed in a liquid nitrogen bath for 10 min and then kept at 120 °C for 72 h and then cooled to room temperature. The dark purple precipitate formed was filtered and washed with DMSO. The solid was then extracted in a Soxhlet extractor with THF and then dried under vacuum at 40 °C for 12 h to give **Fe-POP-2** as a dark purple powder (40.3 mg, 85%). The product was insoluble in common solvents including water, DMSO, DMF, acetone or acetonitrile.

**Fe-POP-3.** Compounds **2a** (32.7 mg, 0.033 mmol) and **3c** (26.0 mg, 0.1 mmol) were dissolved in a mixture of 1,2-dichlorobenzene/isopropanol (1/3, v/v) (2 mL) and aqueous acetic acid (6 M, 0.2 mL) in a 10 mL Schlenk tube. The tube was sealed after being degassed in a liquid nitrogen bath for 10 min and then kept at 120 °C for 72 h to yield a purple solid. After cooling to room temperature, the solid was filtered, washed with DMSO, extracted in a Soxhlet extractor with THF and dried under vacuum at 40 °C for 12 h to give **Fe-POP-3** as a purple powder (45.2 mg, 82%), which was insoluble in common solvents including water, DMSO, DMF, acetone or acetonitrile.

**General method for visible-light-driven oxidation reaction of benzyl halides.** Benzyl halide **4** (1 mmol, 1.0 equiv.), **Fe-POP-3** (16.5 mg, 0.01 mmol, 0.01 equiv.), 4-methoxypyridine (21.8 mg, 0.2 mmol, 0.2 equiv.) and Li<sub>2</sub>CO<sub>3</sub> (73.9 mg, 1.0 mmol, 1.0 equiv.) were dissolved in DMAc (5 mL). The heterogeneous catalyst was dispersed via ultrasound and a needle was inserted into the reaction flask to provide air. The mixture was stirred under the irradiation of two blue LED lights for 24 h at the distance of 8 cm. A powerful fan was used to keep the system cool. After reaction, 5 mL HCl (aq., 1 M) was added to the mixture. The mixture was extracted with ethyl acetate (10 mL × 3) and the organic phase was combined. The solution was then washed with deionized water (15 mL × 3) and brine (15 mL) and concentrated *in vacuo*. The product was purified by flash column chromatography on silica gel (hexane/ether acetate) to give **5**.

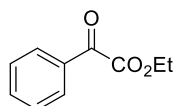

**Compound 5a.** Compound **4a** (243.1 mg) was used to give **5a** (125 mg, 70%), which was purified by flash column chromatography (hexane/ether acetate=30/1, v/v) as pale-yellow oil. <sup>1</sup>H NMR (400 MHz, CDCl<sub>3</sub>) δ 8.02-7.99 (m, 2H), 7.65 (tt, *J* = 7.4, 1.2 Hz, 1H), 7.51 (t, *J* = 7.8 Hz, 2H), 4.45 (q, *J* = 7.2 Hz, 2H), 1.42 (t, *J* = 7.2 Hz, 3H).

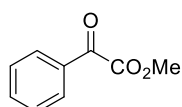

**Compound 5b.** Compound **4b** (229 mg) was used to give **5b** (144 mg, 87%), which was purified by flash column chromatography (hexane/ether acetate=40/1, v/v) as colorless oil. <sup>1</sup>H

NMR (400 MHz, CDCl<sub>3</sub>)  $\delta$  8.01 (dd,  $J$  = 8.4, 1.2 Hz, 2H), 7.66 (tt,  $J$  = 7.6, 1.3 Hz, 1H), 7.51 (t,  $J$  = 7.8 Hz, 2H), 3.98 (s, 3H).

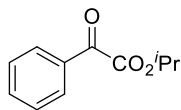

**Compound 5c.** Compound **4c** (259.2 mg) was used to give **5c** (198.4 mg, 93%), purified by flash column chromatography (hexane/ether acetate = 40/1, v/v) as colorless oil. <sup>1</sup>H NMR (400 MHz, CDCl<sub>3</sub>)  $\delta$  7.99 (d,  $J$  = 8.0 Hz, 2H), 7.65 (t,  $J$  = 7.2 Hz, 1H), 7.51 (t,  $J$  = 7.8 Hz, 2H), 5.37-5.27 (m, 1H), 1.41 (d,  $J$  = 6.0 Hz, 6H).

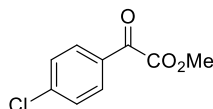

**Compound 5d.** Compound **4d** (264 mg) was used to give **5d** (160 mg, 81%), purified by flash column chromatography (hexane/ether acetate = 50/1, v/v) as colorless oil. <sup>1</sup>H NMR (400 MHz, CDCl<sub>3</sub>)  $\delta$  7.99 (dt,  $J$  = 8.8, 2.2 Hz, 2H), 7.48 (dt,  $J$  = 8.8, 2.1 Hz, 2H), 3.97 (s, 3H).

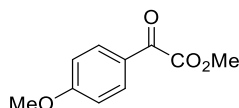

**Compound 5e.** Compound **4d** (264 mg) was used to give **5e** (160 mg, 81%), purified by flash column chromatography (hexane/ether acetate = 40/1, v/v) as colorless oil. <sup>1</sup>H NMR (400 MHz, CDCl<sub>3</sub>)  $\delta$  8.01 (dt,  $J$  = 9.2, 2.4 Hz, 2H), 6.97 (dt,  $J$  = 9.2, 2.4 Hz, 2H), 3.96 (s, 3H), 3.90 (s, 3H).

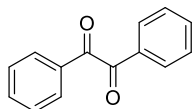

**Compound 5f.** Compound **4f** (275.2 mg) was used to give **5f** (202 mg, 96%), purified by flash column chromatography (hexane/ether acetate = 50/1, v/v) as yellow solid. <sup>1</sup>H NMR (400 MHz, CDCl<sub>3</sub>)  $\delta$  7.99-7.97 (m, 2H), 7.66 (tt,  $J$  = 7.4, 1.2 Hz, 1H), 7.52 (t,  $J$  = 7.8 Hz, 2H).

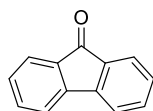

**Compound 5g.** Compound **4g** (245.1 mg) was used to give **5g** (160.4 mg, 88%), purified by flash column chromatography (hexane/ether acetate = 50/1, v/v) as yellow solid. <sup>1</sup>H NMR (400 MHz, CDCl<sub>3</sub>)  $\delta$  7.66 (d,  $J$  = 7.6 Hz, 1H), 7.54-7.47 (m, 2H), 7.29 (td,  $J$  = 7.4, 1.2 Hz, 1H).

**General method for visible-light-driven enantioselective  $\alpha$ -alkylation of aldehydes.**

Aldehyde **6** (1.0 mmol, 2.0 equiv.), bromide **7** (0.5 mmol, 1.0 equiv.), chiral organocatalyst **8** (32 mg, 0.1 mmol, 0.2 equiv.), **Fe-POP-3** (8.7 mg, 0.005 mmol, 0.01 equiv.) and 2,6-lutine (107 mg, 1.0 mmol, 2.0 equiv.) were dissolved in anhydrous DMF (1 mL). The reaction flask was sealed after the heterogeneous catalyst was dispersed via ultrasound and the mixture was protected by N<sub>2</sub>. The mixture was stirred with irradiation of two blue LED lights for 24 h. A fan was used to keep the system cool. After reaction, 5 mL HCl (aq., 1 M) was added to the mixture. The mixture was extracted with ethyl acetate (10 mL  $\times$  3) and the organic phase was combined. The solution was then washed with deionized water (15 mL  $\times$  3) and brine (15 mL) and concentrated *in vacuo*. The product was purified by flash column chromatography on silica gel (hexane/ether acetate) to give **9**.

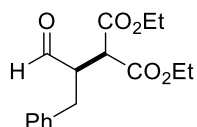

**Compound 9a.** Compounds **6a** (134.2 mg) and **7a** (119.5 mg) were used to give **9a** (121 mg, 83% yield, 95% ee), purified flash column chromatography (hexane/ether acetate = 11/1, v/v) as colorless oil.  $^1\text{H NMR}$  (400 MHz,  $\text{CDCl}_3$ )  $\delta$  9.75 (s, 1H), 7.30-7.15 (m, 5H), 4.22-4.14 (m, 4H), 3.65 (d,  $J = 8.0$  Hz, 1H), 3.36 (q,  $J = 7.3$  Hz, 1H), 3.10 (dd,  $J = 14.0, 7.6$  Hz, 1H), 2.80 (dd,  $J = 14.0, 7.6$  Hz, 1H), 1.24 (t,  $J = 7.2$  Hz, 6H). The enantiomeric excess was determined by chiral HPLC with IC chiral column (hexane/isopropanol=90/10; flow 1 mL·min $^{-1}$ ); (*S*)-isomer:  $t_r = 14.38$  min, (*R*)-isomer:  $t_r = 17.08$  min.

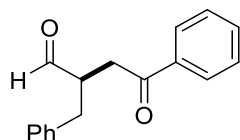

**Compound 9b.** Compounds **6a** (134.2 mg) and **7b** (99.5 mg) were used to give **9b** (108 mg, 85% yield, 92% ee), purified by flash column chromatography (hexane/ether acetate = 9/1, v/v) as colorless oil.  $^1\text{H NMR}$  (400 MHz,  $\text{CDCl}_3$ )  $\delta$  9.90 (s, 1H), 7.93-7.90 (m, 2H), 7.56 (tt,  $J = 7.4, 1.4$  Hz, 1H), 7.46-7.42 (m, 2H), 7.33-7.29 (m, 2H), 7.25-7.30 (m, 3H), 3.47-3.37 (m, 2H), 3.17 (dd,  $J = 13.6, 6.2$  Hz, 1H), 3.06-2.99 (m, 1H), 2.86-2.80 (m, 1H). The enantiomeric excess was determined by chiral HPLC with IC chiral column (hexane/isopropanol = 95/5; flow 1 mL·min $^{-1}$ ); (*S*)-isomer:  $t_r = 14.68$  min, (*R*)-isomer:  $t_r = 16.06$  min.

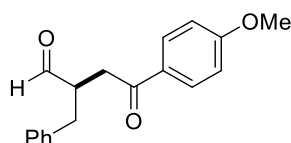

**Compound 9c.** Compounds **6a** (134.2 mg) and **7c** (116.7 mg) were used to give **9c** (113 mg, 80% yield, 89% ee), purified by flash column chromatography (hexane/ether acetate = 9/1, v/v) as colorless oil.  $^1\text{H NMR}$  (400 MHz,  $\text{CDCl}_3$ )  $\delta$  9.90 (s, 1H), 7.89 (d,  $J = 8.8$  Hz, 2H), 7.32-7.19 (m, 5H), 6.91 (d,  $J = 8.8$  Hz, 2H), 3.85 (s, 3H), 3.40-3.33 (m, 2H), 3.16 (dd,  $J = 14.0, 6.0$  Hz, 1H), 2.99 (m, 1H), 2.82 (dd,  $J = 14.4, 7.6$  Hz, 1H). The enantiomeric excess was determined by chiral HPLC with IC chiral column (hexane/isopropanol = 90/10; flow 1 mL·min $^{-1}$ ); (*S*)-isomer:  $t_r = 33.54$  min, (*R*)-isomer:  $t_r = 37.53$  min.

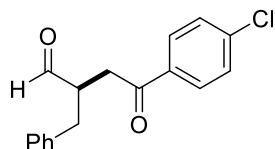

**Compound 9d.** Compounds **6a** (134.2 mg) and **7d** (114.5 mg) were used to give **9d** (110.4 mg, 77% yield, 93% ee), purified by flash column chromatography (hexane/ether acetate = 10/1, v/v) as colorless oil.  $^1\text{H NMR}$  (400 MHz,  $\text{CDCl}_3$ )  $\delta$  9.88 (s, 1H), 7.83 (d,  $J = 8.4$  Hz, 2H), 7.40 (d,  $J = 8.8$  Hz, 2H), 7.32-7.18 (m, 5H), 3.42-3.34 (m, 2H), 3.17 (dd,  $J = 14.0, 6.0$  Hz, 1H), 2.98-2.91 (m, 1H), 2.84-2.79 (m, 1H). The enantiomeric excess was determined by chiral HPLC with IC chiral column (hexane/isopropanol = 95/5; flow 1 mL·min $^{-1}$ ); (*S*)-isomer:  $t_r = 13.80$  min, (*R*)-isomer:  $t_r = 15.40$  min.

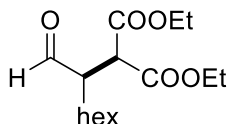

**Compound 9e.** Compounds **6b** (128.2 mg) and **7a** (99.5 mg) were used to give **9e** (123 mg, 86% yield, 93% ee), purified by flash column chromatography (hexane/ether acetate = 12/1, v/v) as colorless oil.  $^1\text{H NMR}$  (400 MHz,  $\text{CDCl}_3$ )  $\delta$  9.77 (s, 1H), 4.25-4.17 (m, 4H), 3.73 (d,  $J$  = 8.0 Hz, 1H), 3.10 (m, 1H), 1.75-1.66 (m, 1H), 1.61-1.54 (m, 1H), 1.39-1.24 (m, 16H), 0.89-0.85 (m, 3H).

The enantiomeric excess was determined using the reported method (Ref. 58 in the main text): Compound **9e** (40 mg) was added to a mixture of 17.5 mg of (2*S*,4*S*)-(+)-pentanediol and 3 mg of *p*-toluenesulfonic acid monohydrate in DCM (2 mL). After 1 h, the consumption of the aldehyde was complete (monitored by TLC). The mixture was concentrated *in vacuo* and the enantiomeric excess of the title compound was determined by integrating the two  $^1\text{H NMR}$  signals (both doublets) in  $\text{CDCl}_3$  at 3.70 ppm (minor) and 3.67 ppm (major) arising from the resultant diastereomeric acetals.

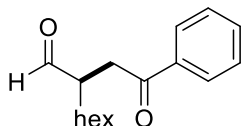

**Compound 9f.** Compounds **6b** (128.2 mg) and **7b** (99.5 mg) were used to give **9f** (106 mg, 86% yield, 95% ee), purified by flash column chromatography (hexane/ether acetate = 8/1, v/v) as colorless oil.  $^1\text{H NMR}$  (400 MHz,  $\text{CDCl}_3$ )  $\delta$  9.81 (s, 1H), 7.97 (d,  $J$  = 8.0 Hz, 2H), 7.56 (t,  $J$  = 6.8 Hz, 1H), 7.46 (t,  $J$  = 7.2 Hz, 2H), 3.47 (dd,  $J$  = 18.4, 7.2 Hz, 1H), 3.12-2.99 (m, 2H), 1.83-1.74 (m, 1H), 1.57-1.49 (m, 1H), 1.37-1.27 (m, 8H), 0.87 (t,  $J$  = 6.0 Hz, 3H). The enantiomeric excess was determined by chiral HPLC with IC chiral column (hexane/isopropanol=95/5; flow 1 mL·min $^{-1}$ ); (*S*)-isomer:  $t_r$  = 14.26 min, (*R*)-isomer:  $t_r$  = 17.44 min.

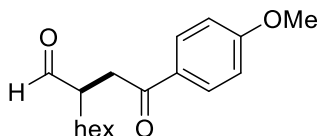

**Compound 9g.** Compounds **6b** (128.2 mg) and **7c** (116.7 mg) were used to give **9g** (132 mg, 84% yield, 93% ee), purified by flash column chromatography (hexane/ether acetate = 9/1, v/v) as colorless oil.  $^1\text{H NMR}$  (400 MHz,  $\text{CDCl}_3$ )  $\delta$  9.82 (s, 1H), 7.95 (d,  $J$  = 9.2 Hz, 2H), 6.94 (d,  $J$  = 8.8 Hz, 2H), 3.87 (s, 3H), 3.41 (dd,  $J$  = 17.2, 8.0 Hz, 1H), 3.11-3.04 (m, 1H), 2.99 (dd,  $J$  = 17.2, 4.8 Hz, 1H), 1.83-1.74 (m, 1H), 1.57-1.48 (m, 1H), 1.38-1.28 (m, 8H), 0.88 (t,  $J$  = 6.8 Hz, 3H). The enantiomeric excess was determined by chiral HPLC with IC chiral column (hexane/isopropanol=90/10; flow 1 mL·min $^{-1}$ ); (*S*)-isomer:  $t_r$  = 26.48 min, (*R*)-isomer:  $t_r$  = 30.94 min.

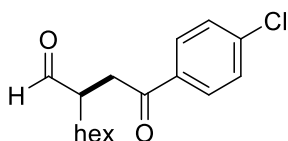

**Compound 9h.** Compounds **6b** (128.2 mg) and **7d** (114.5 mg) were used to give **9h** (109.5 mg,

79% yield, 93% ee), purified by flash column chromatography (hexane/ether acetate = 9/1, v/v) as colorless oil.  $^1\text{H}$  NMR (400 MHz,  $\text{CDCl}_3$ )  $\delta$  9.81 (s, 1H), 7.91 (d,  $J = 8.4$  Hz, 2H), 7.44 (d,  $J = 8.8$  Hz, 2H), 3.44 (dd,  $J = 18.0, 8.0$  Hz, 1H), 3.14-3.07 (m, 1H), 2.95 (dd,  $J = 17.6, 4.8$  Hz, 1H), 1.84-1.75 (m, 1H), 1.58-1.49 (m, 1H), 1.38-1.28 (m, 8H), 0.88 (t,  $J = 6.4$  Hz, 3H). The enantiomeric excess was determined by chiral HPLC with IC chiral column (hexane/isopropanol = 95/5; flow  $1 \text{ mL}\cdot\text{min}^{-1}$ ); (*S*)-isomer:  $t_r = 12.32$  min, (*R*)-isomer:  $t_r = 14.44$  min.

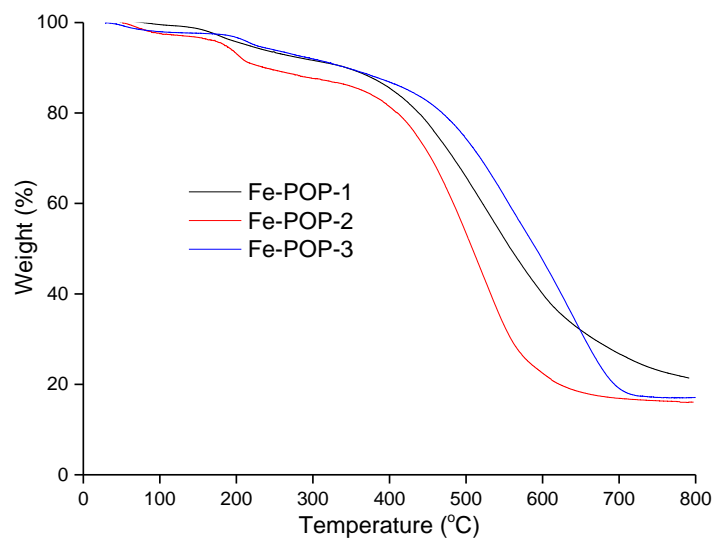

**Fig. S1** Thermogravimetric profile of polymers **Fe-POP-1~3**.

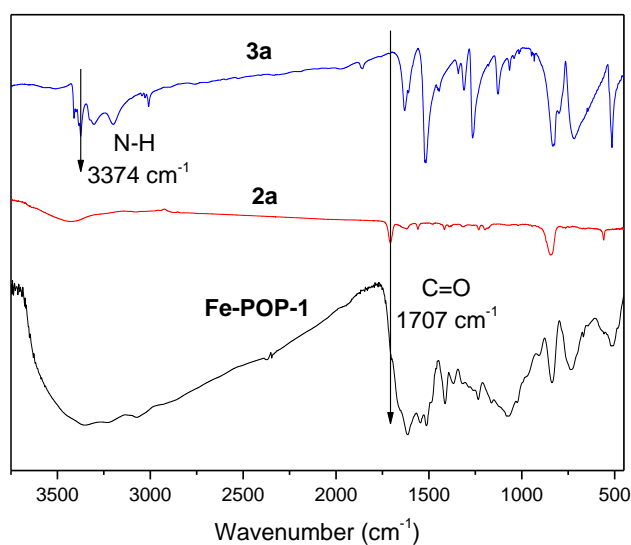

**Fig. S2** FT-IR spectra of compound **2a, 3a** and polymer **Fe-POP-1**.

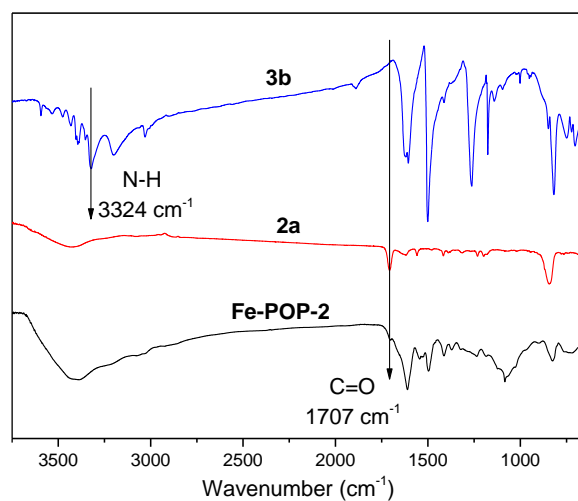

**Fig. S3** FT-IR spectra of compound **2a, 3b** and polymer **Fe-POP-2**.

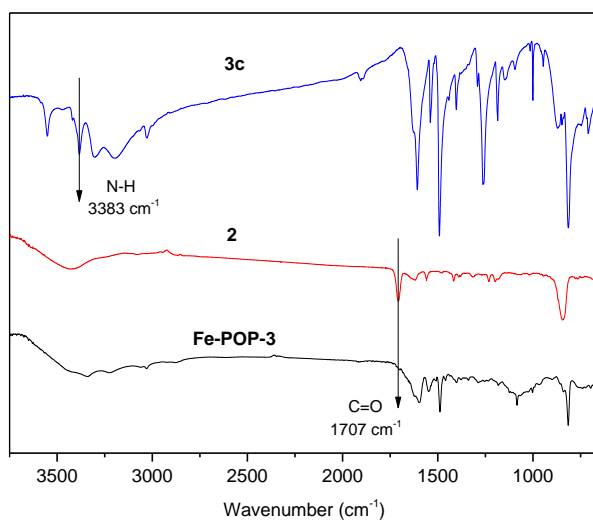

**Fig. S4** FT-IR spectra of compound **2a**, **3c** and polymer **Fe-POP-3**.

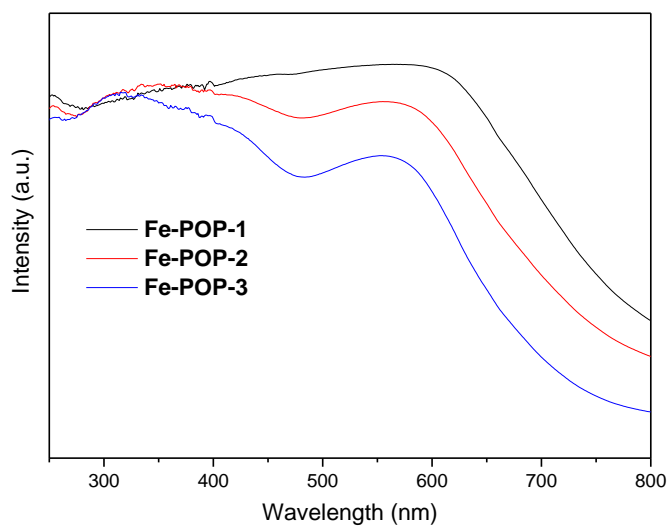

**Fig. S5** Solid state UV-vis absorption spectra of **Fe-POP-1~3**.

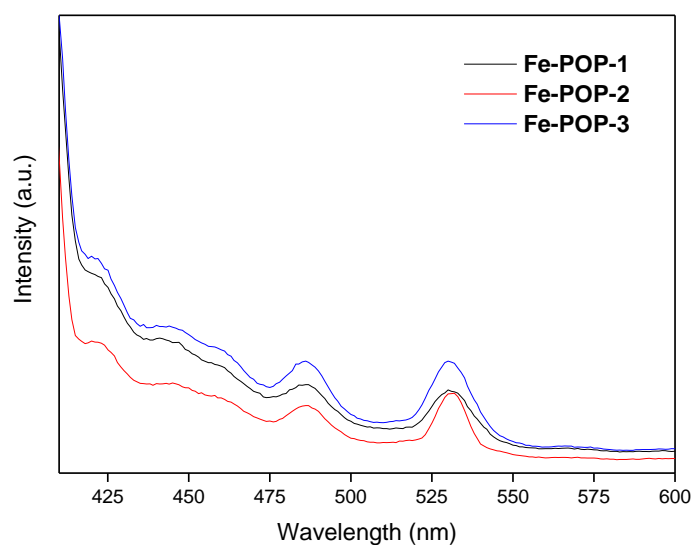

**Fig. S6** Solid state fluorescence emission spectra of **Fe-POP-1~3**.



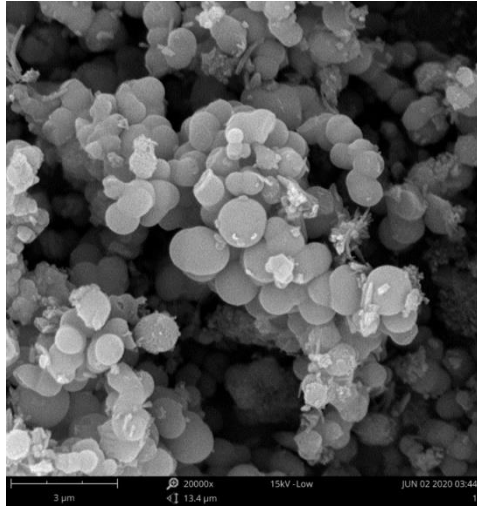

**Fig. S7** Scanning electron microscope (SEM) image of **Fe-POP-1**.

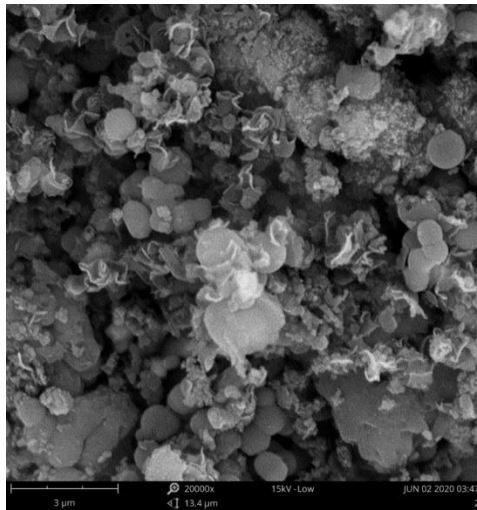

**Fig. S8** Scanning electron microscope (SEM) image of **Fe-POP-2**.

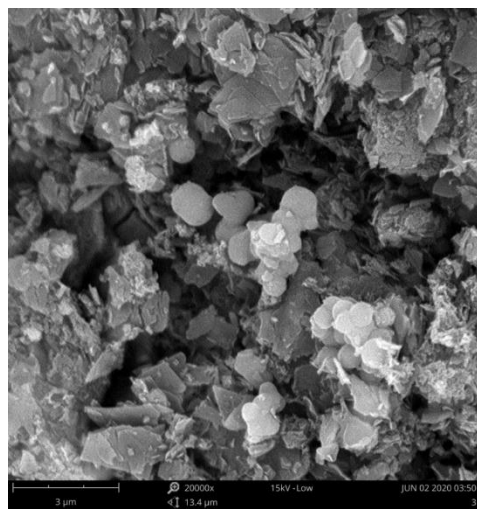

**Fig. S9** Scanning electron microscope (SEM) image of **Fe-POP-3**.

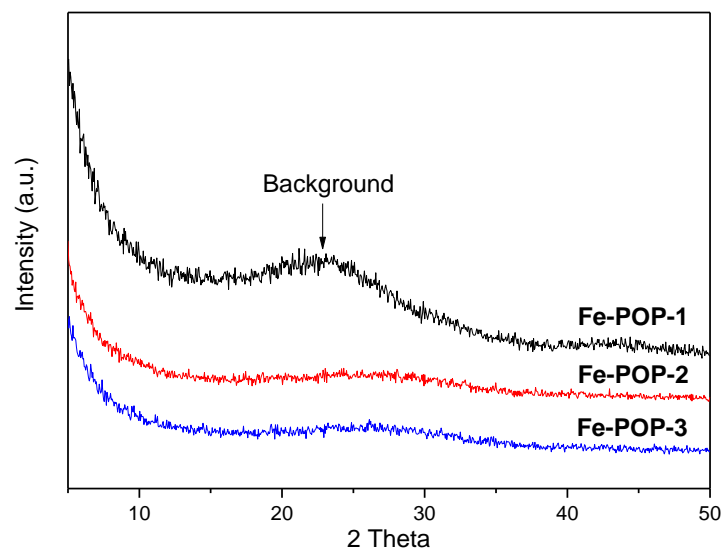

**Fig. S10** PXRD spectra of **Fe-POP-1~3**.

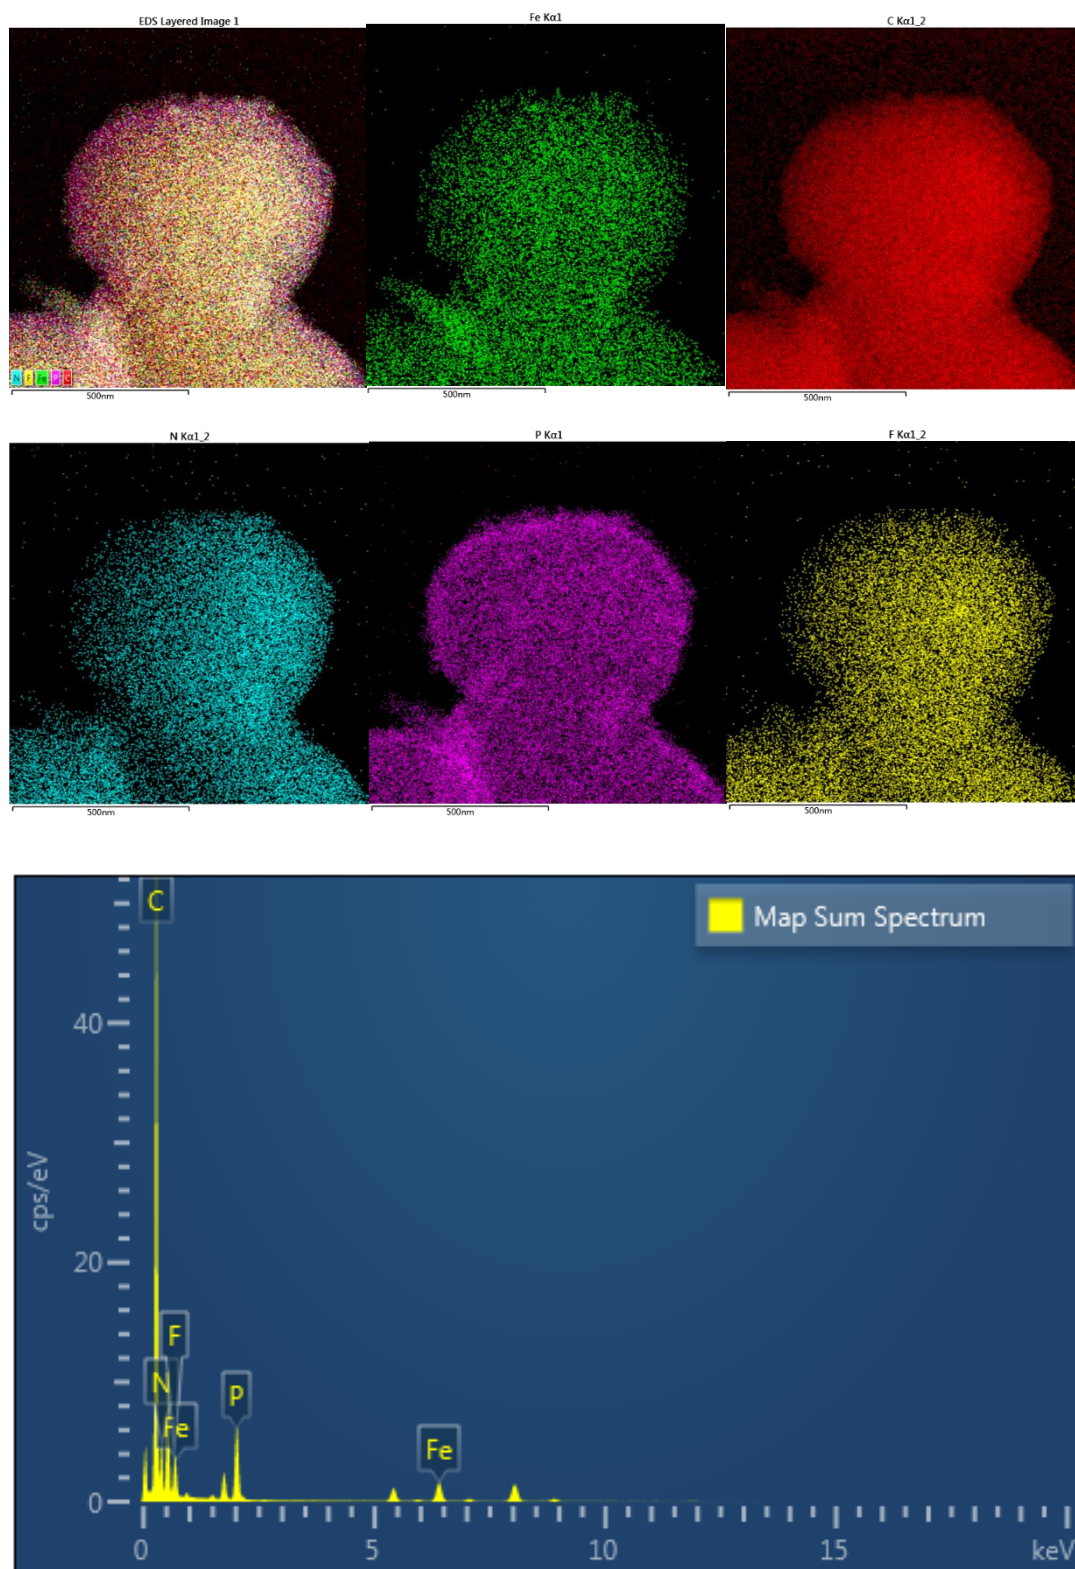

**Fig. S11** Energy dispersive spectroscopic (EDS) images of polymer Fe-POP-1.

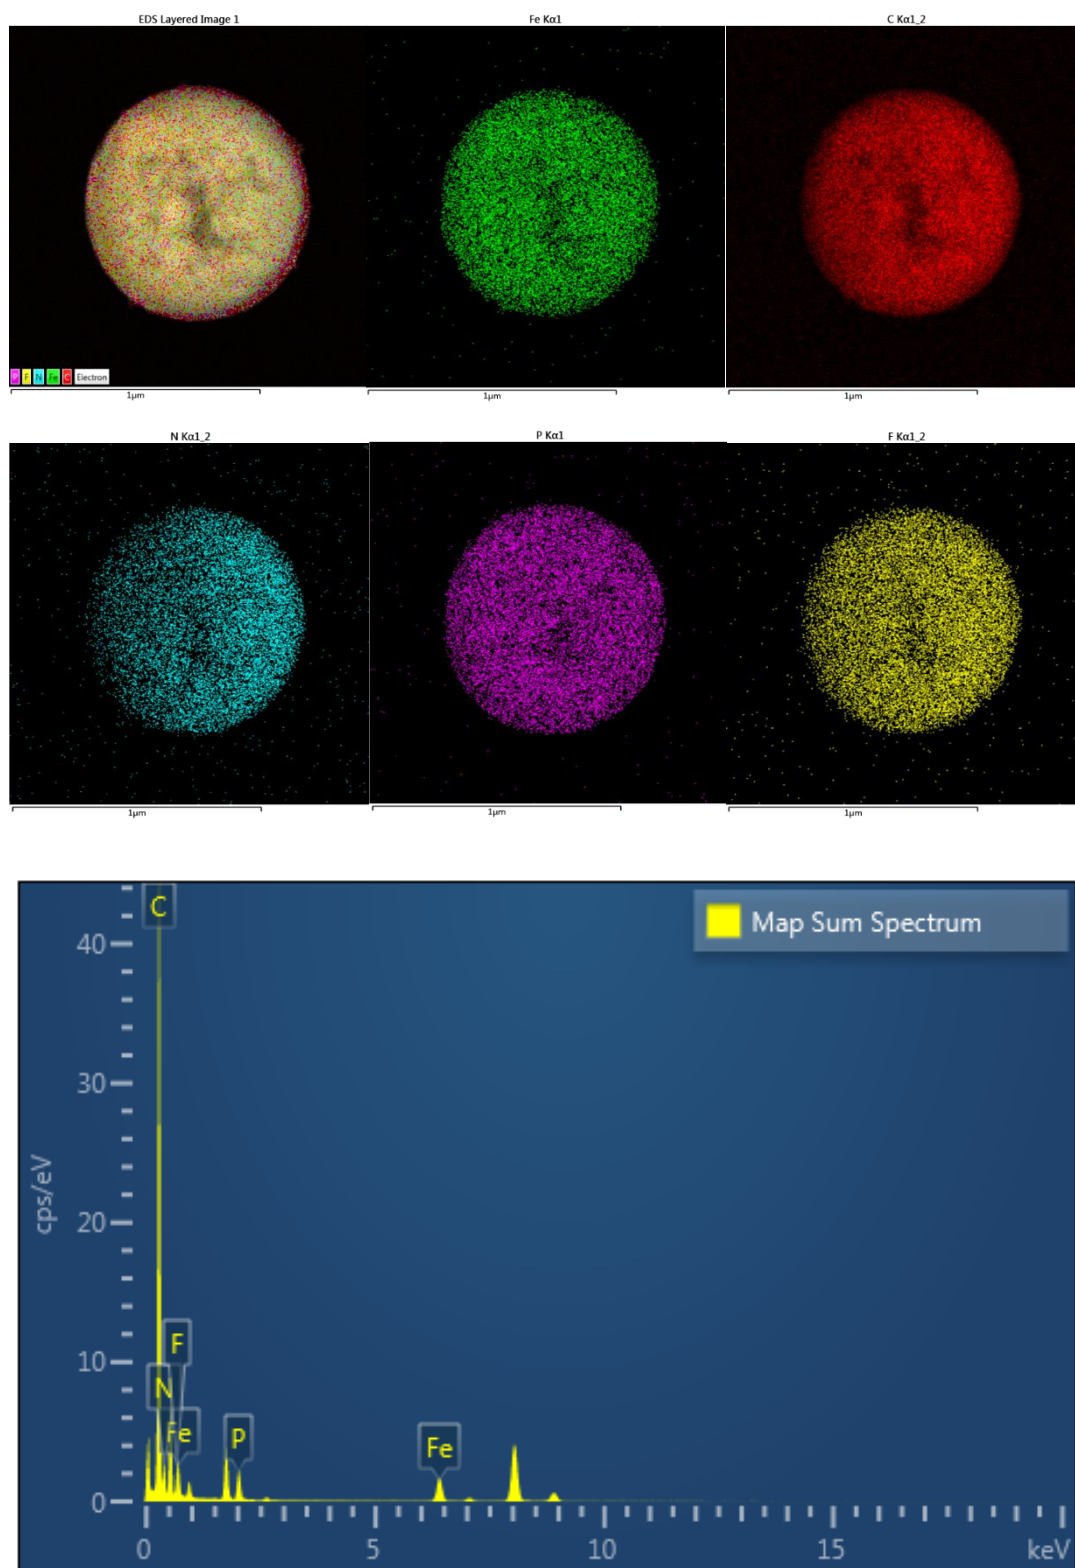

**Fig. S12** Energy dispersive spectroscopic (EDS) images of polymer **Fe-POP-2**.

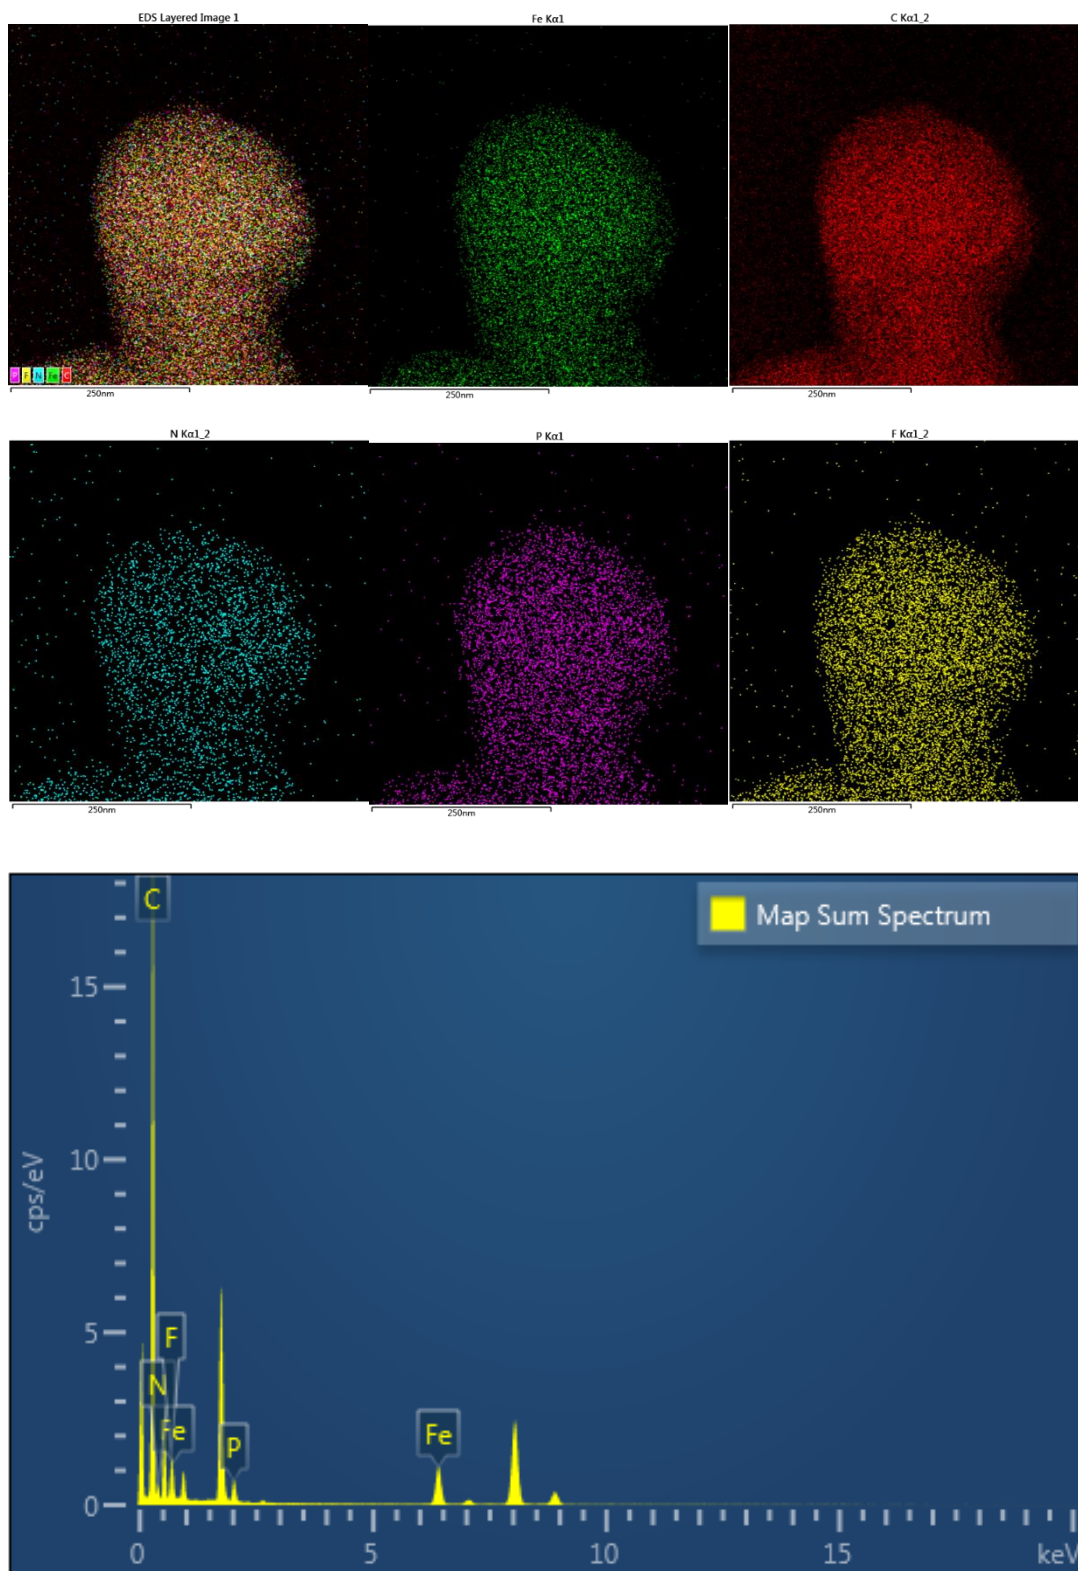

**Fig. S13** Energy dispersive spectroscopic (EDS) images of polymer **Fe-POP-3**.

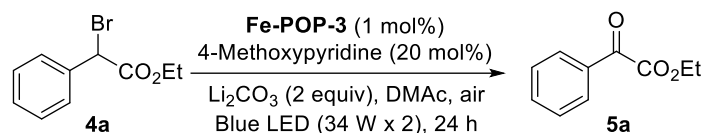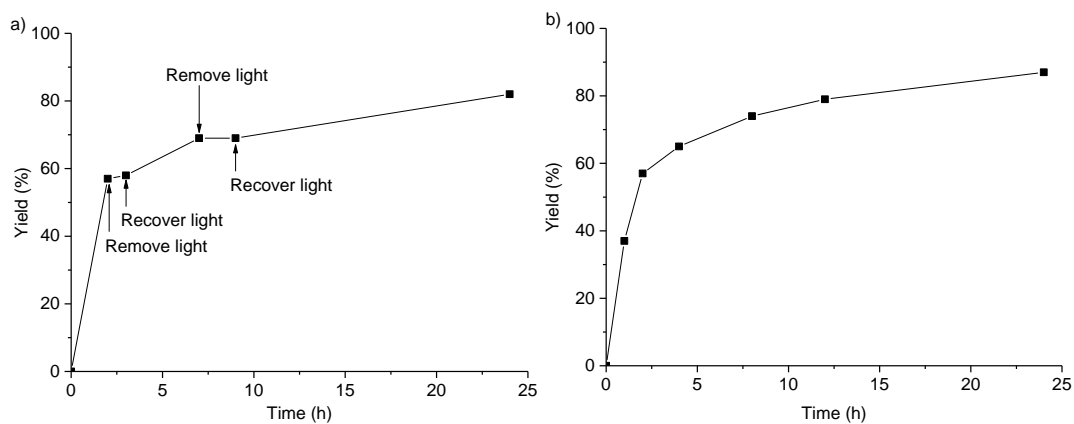

**Fig. S14** a) On-off experiment and b) reaction progress curve for the oxidation of **4a** to produce **5a** in DMAc in the presence of **Fe-POP-3**.

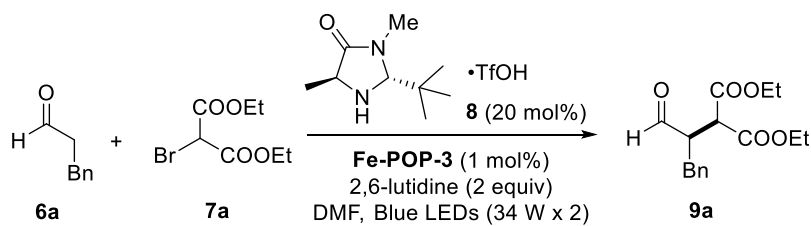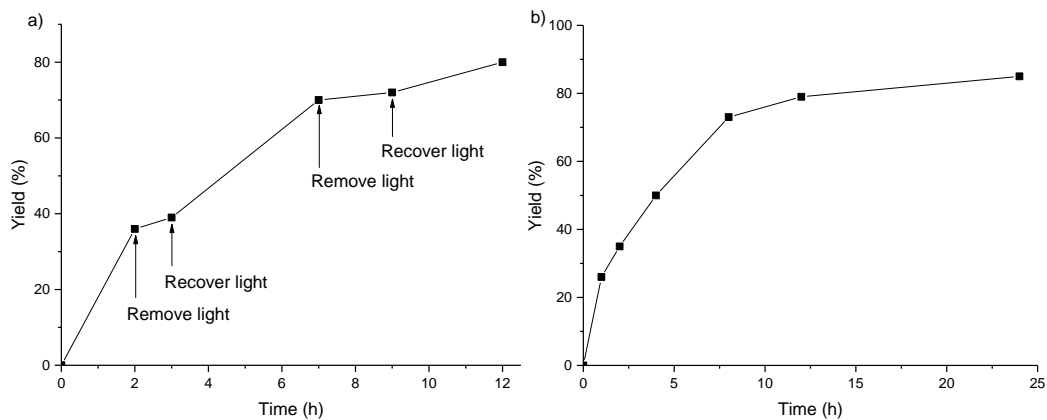

**Fig. S15** a) On-off experiment and b) reaction progress curve for the alkylation of **6a** to produce **9a** in DMF in the presence of **Fe-POP-3**.

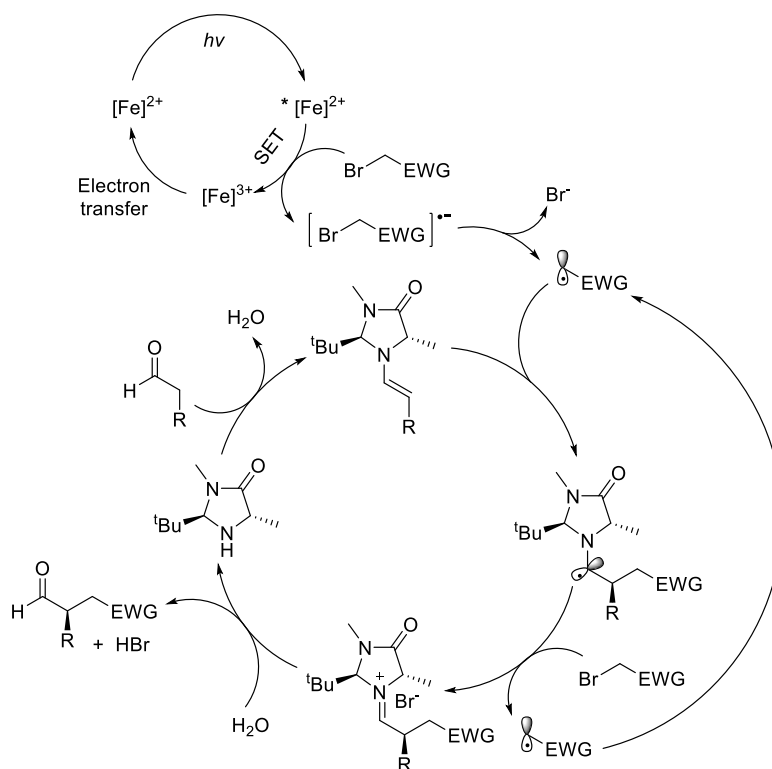

**Fig. S16** Proposed mechanism for the photocatalytic enantioselective  $\alpha$ -alkylation of aldehydes **6a-b** with bromides **7a-d** for the formation of compounds **9a-h** with polymer **Fe-POP-3** as heterogeneous catalyst.

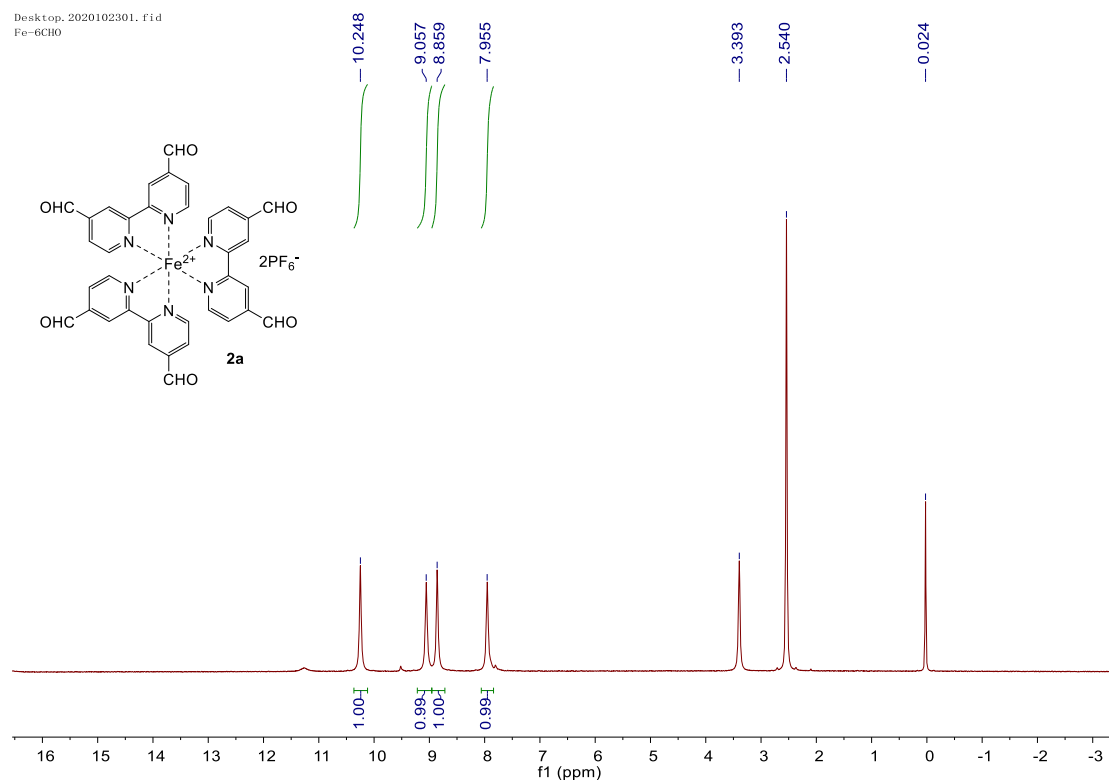

**Fig. S17**  $^1\text{H}$  NMR of compound **2a** in  $\text{DMSO-}d_6$ .

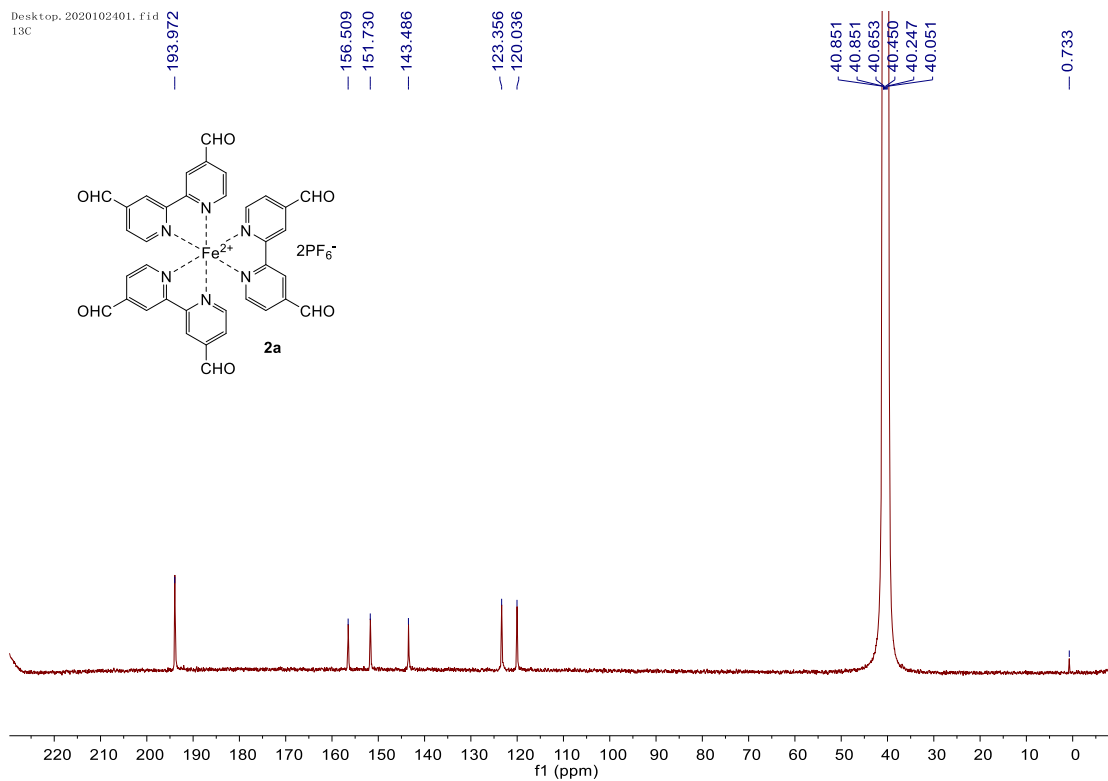

**Fig. S18** <sup>13</sup>C NMR of compound **2a** in DMSO-*d*<sub>6</sub>.

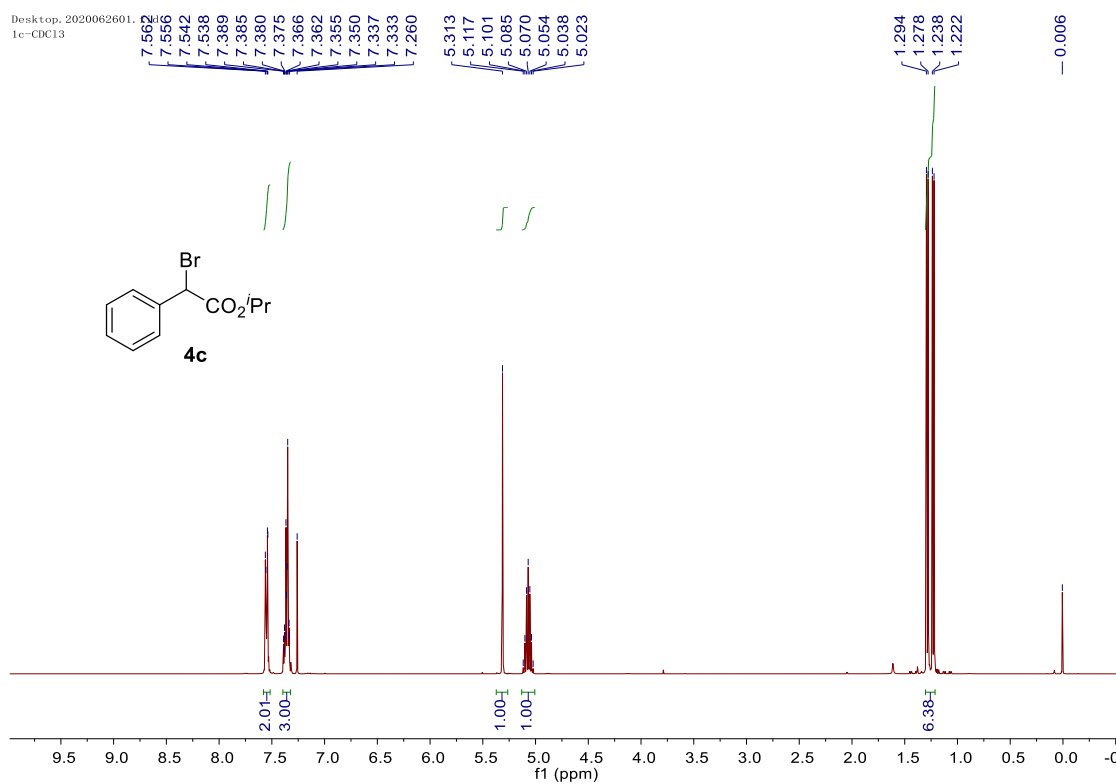

**Fig. S19** <sup>1</sup>H NMR of compound **4c** in CDCl<sub>3</sub>.



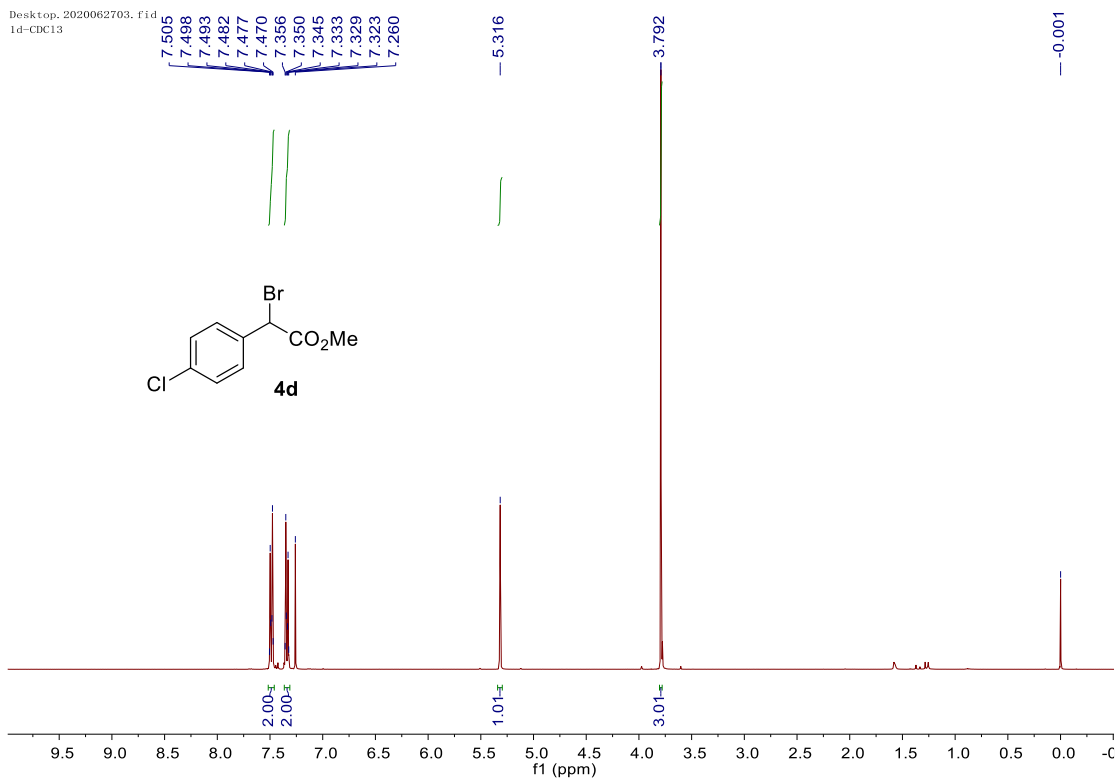

**Fig. S20**  $^1\text{H}$  NMR of compound **4d** in  $\text{CDCl}_3$ .

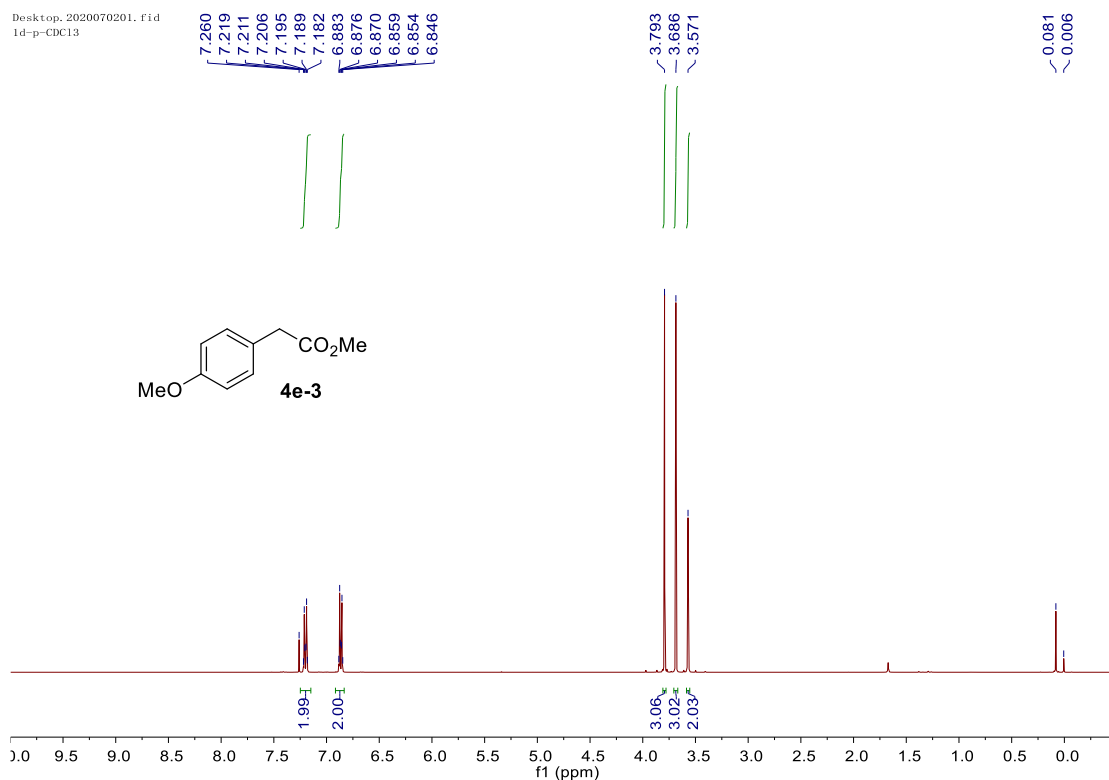

**Fig. S21**  $^1\text{H}$  NMR of compound **4e-3** in  $\text{CDCl}_3$ .

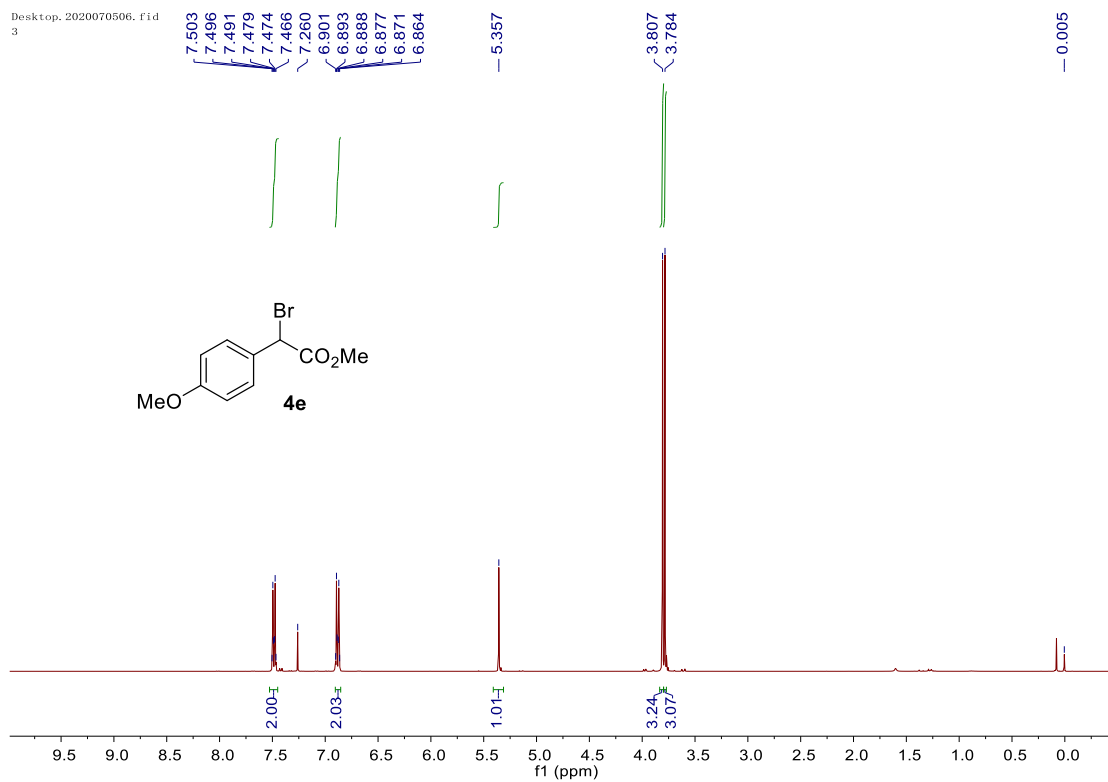

**Fig. S22**  $^1\text{H NMR}$  of compound **4e** in  $\text{CDCl}_3$ .

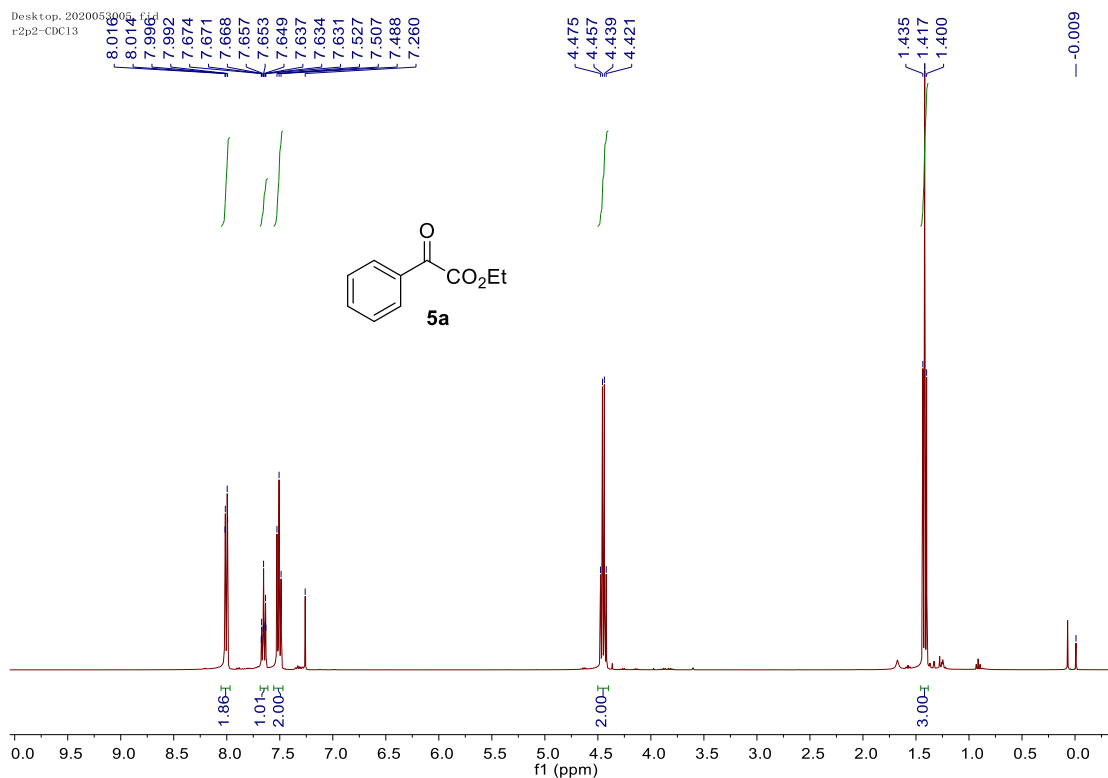

**Fig. S23**  $^1\text{H NMR}$  of compound **5a** in  $\text{CDCl}_3$ .

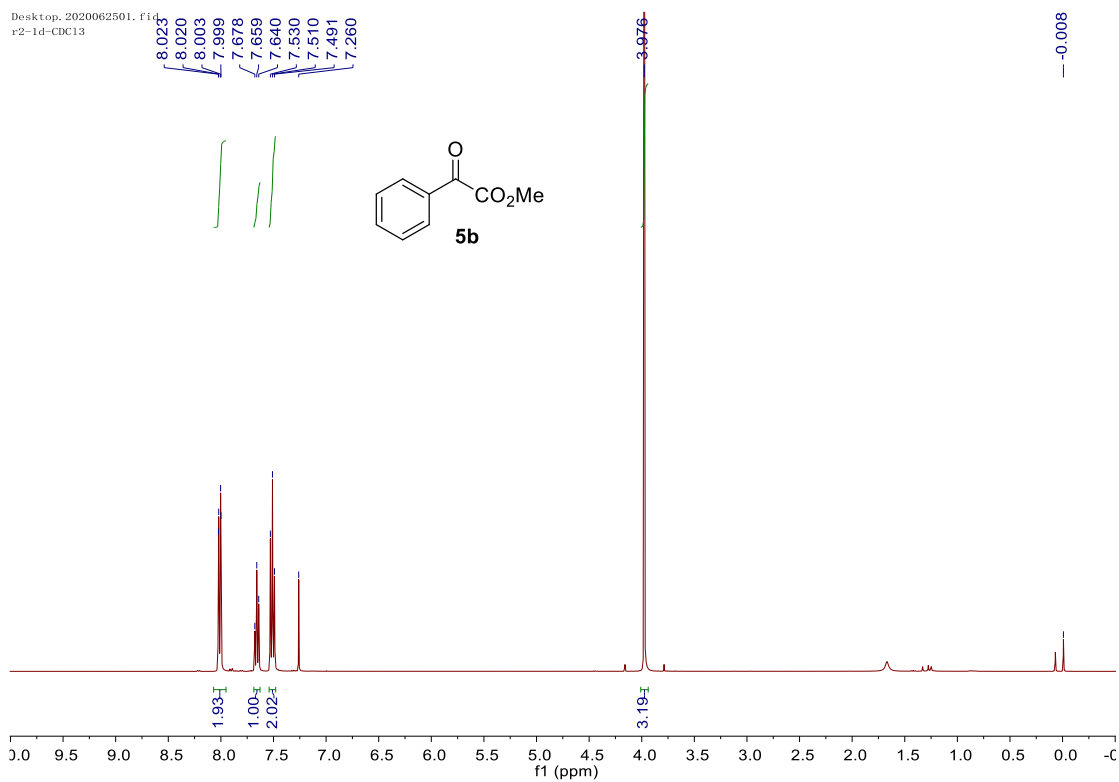

**Fig. S24**  $^1\text{H}$  NMR of compound **5b** in  $\text{CDCl}_3$ .

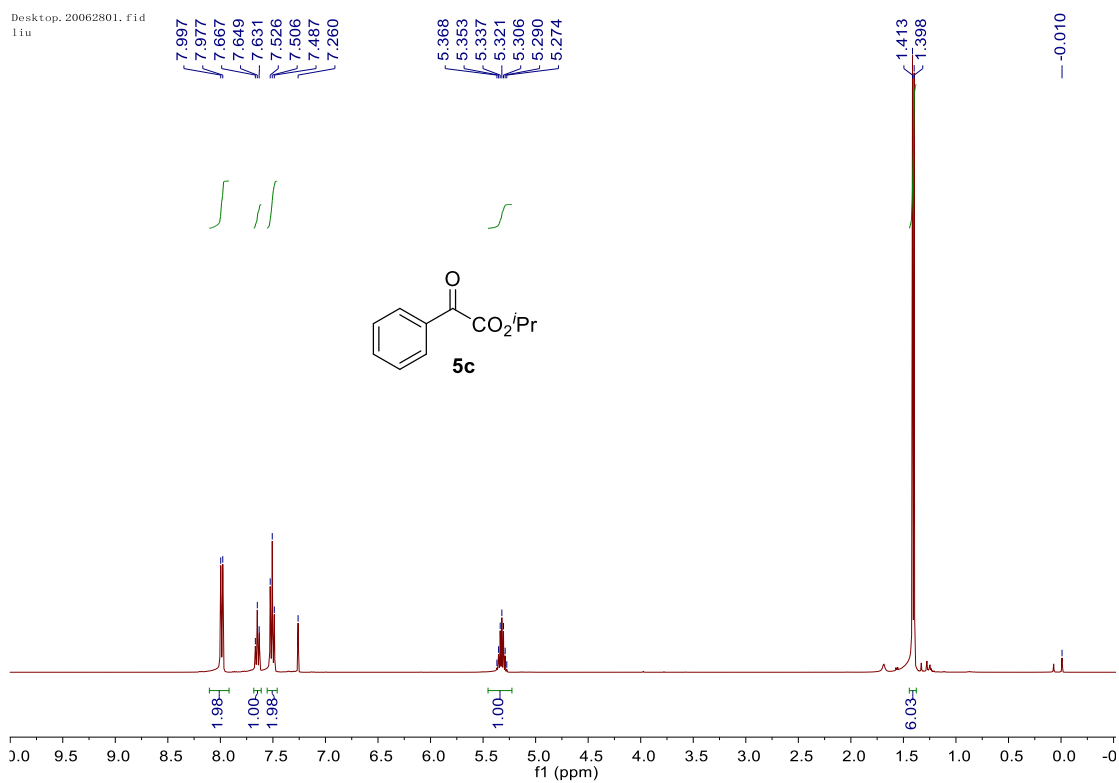

**Fig. S25**  $^1\text{H}$  NMR of compound **5c** in  $\text{CDCl}_3$ .

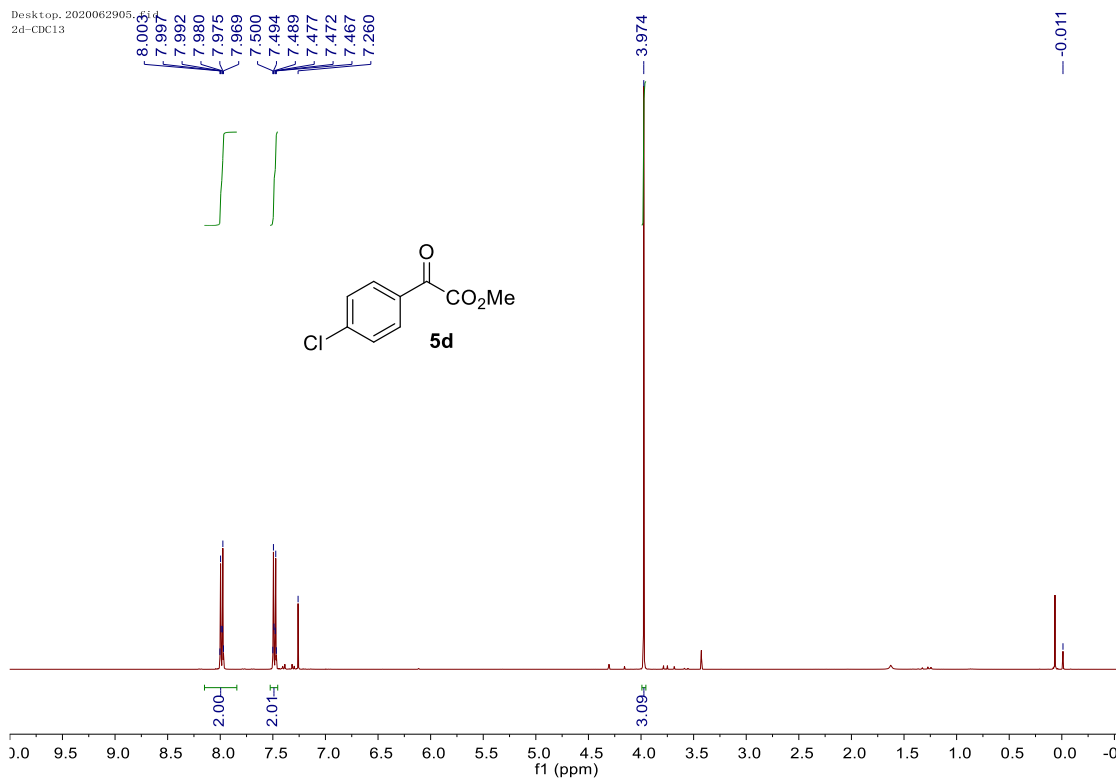

**Fig. S26**  $^1\text{H}$  NMR of compound **5d** in  $\text{CDCl}_3$ .

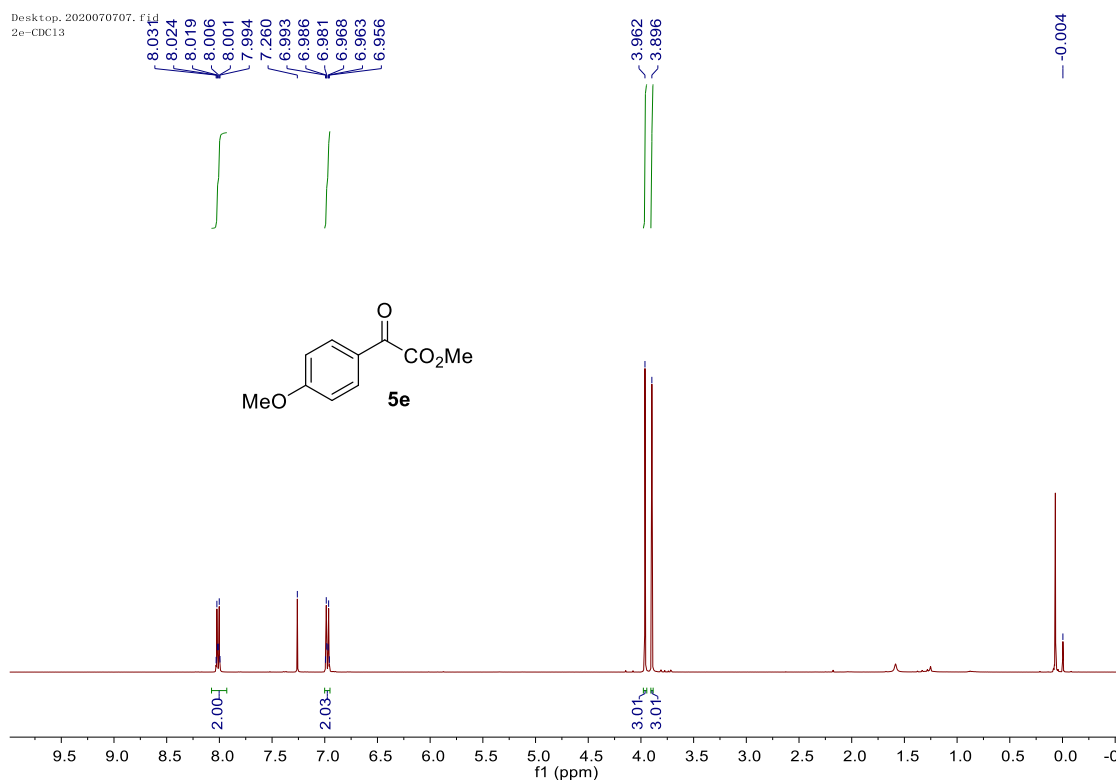

**Fig. S27**  $^1\text{H}$  NMR of compound **5e** in  $\text{CDCl}_3$ .

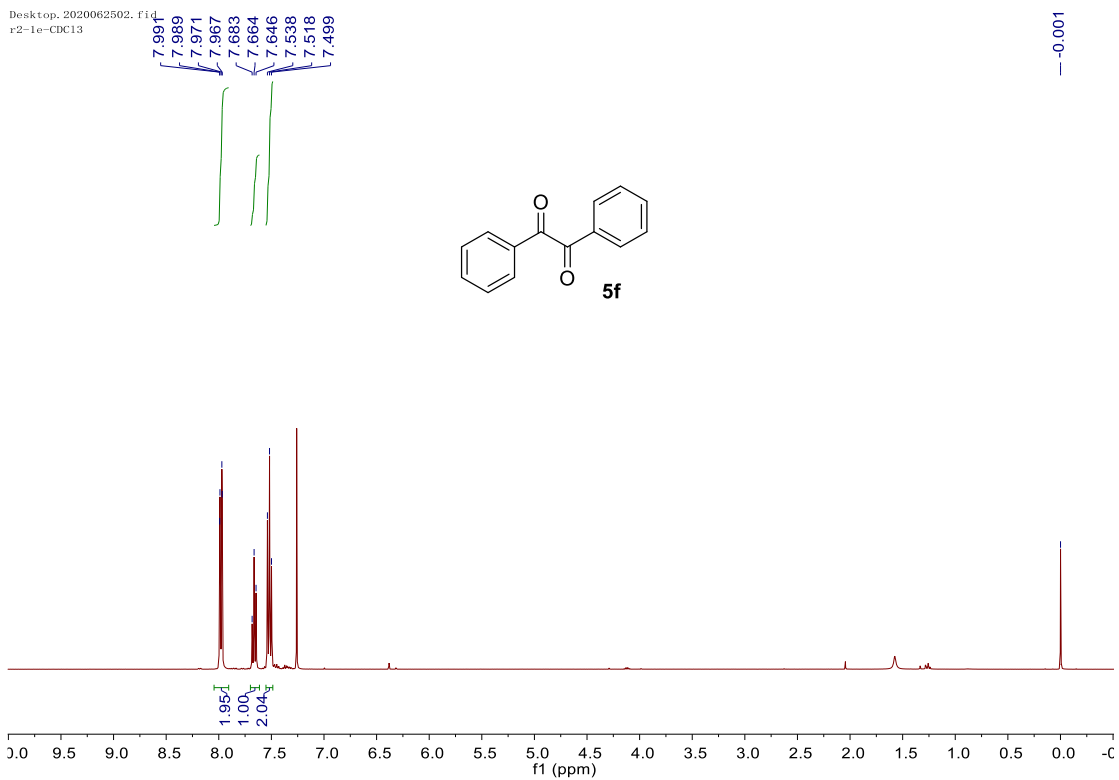

**Fig. S28**  $^1\text{H}$  NMR of compound **5f** in  $\text{CDCl}_3$ .

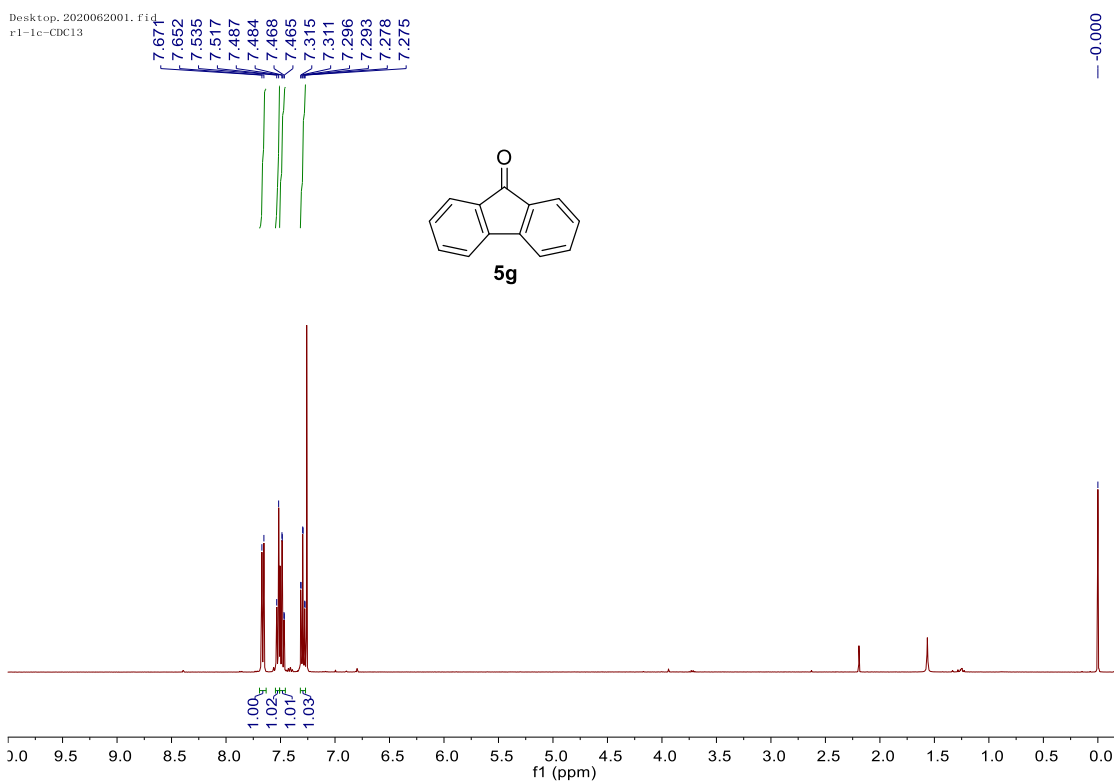

**Fig. S29**  $^1\text{H}$  NMR of compound **5g** in  $\text{CDCl}_3$ .

H NMR/R1-1a  
R1S1-CDC13

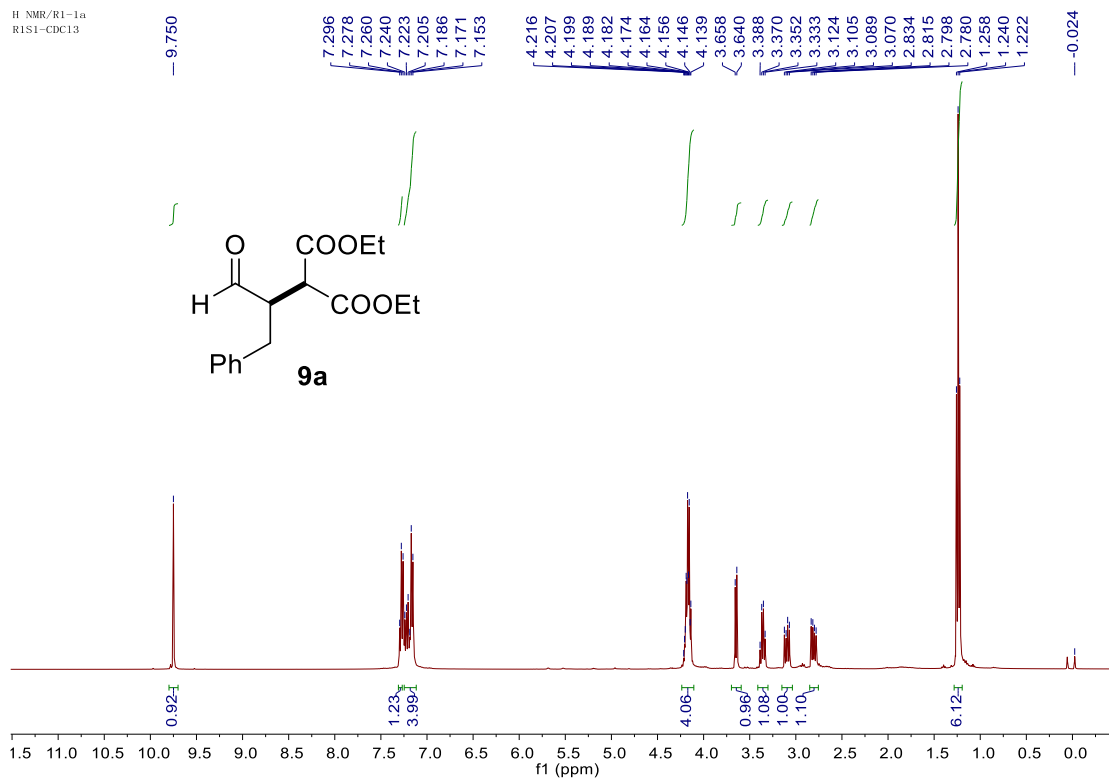

Fig. S30 <sup>1</sup>H NMR of compound **9a** in CDCl<sub>3</sub>.

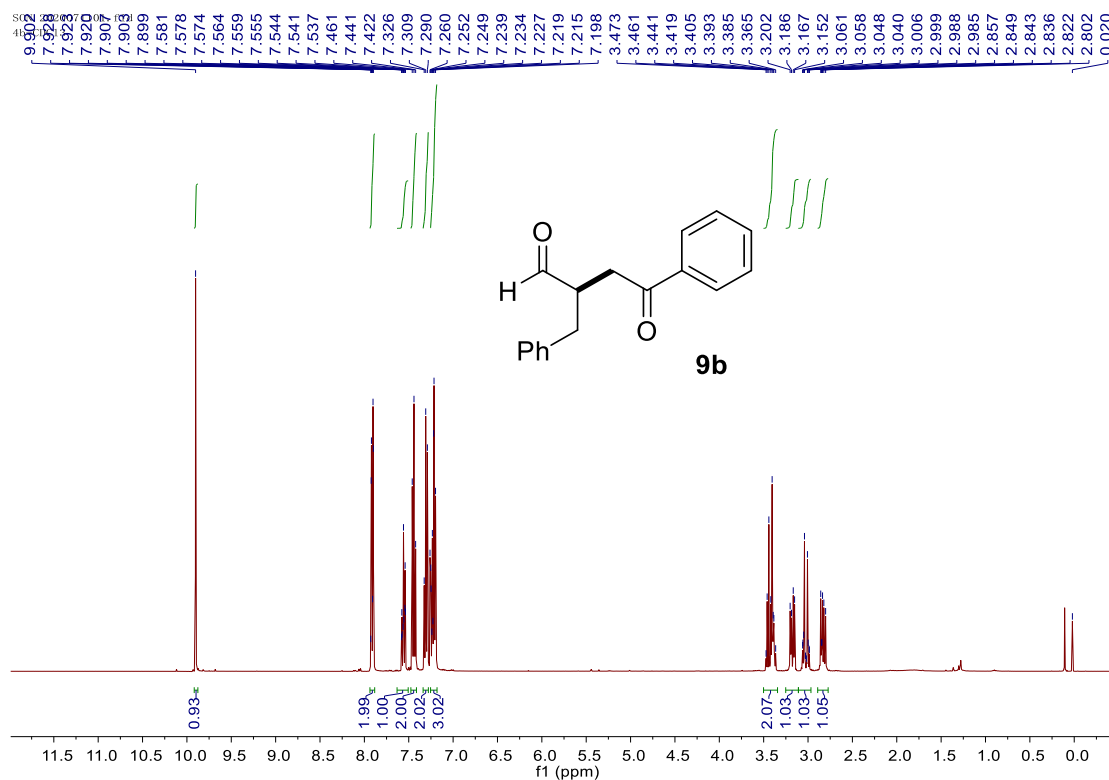

Fig. S31 <sup>1</sup>H NMR of compound **9b** in CDCl<sub>3</sub>.

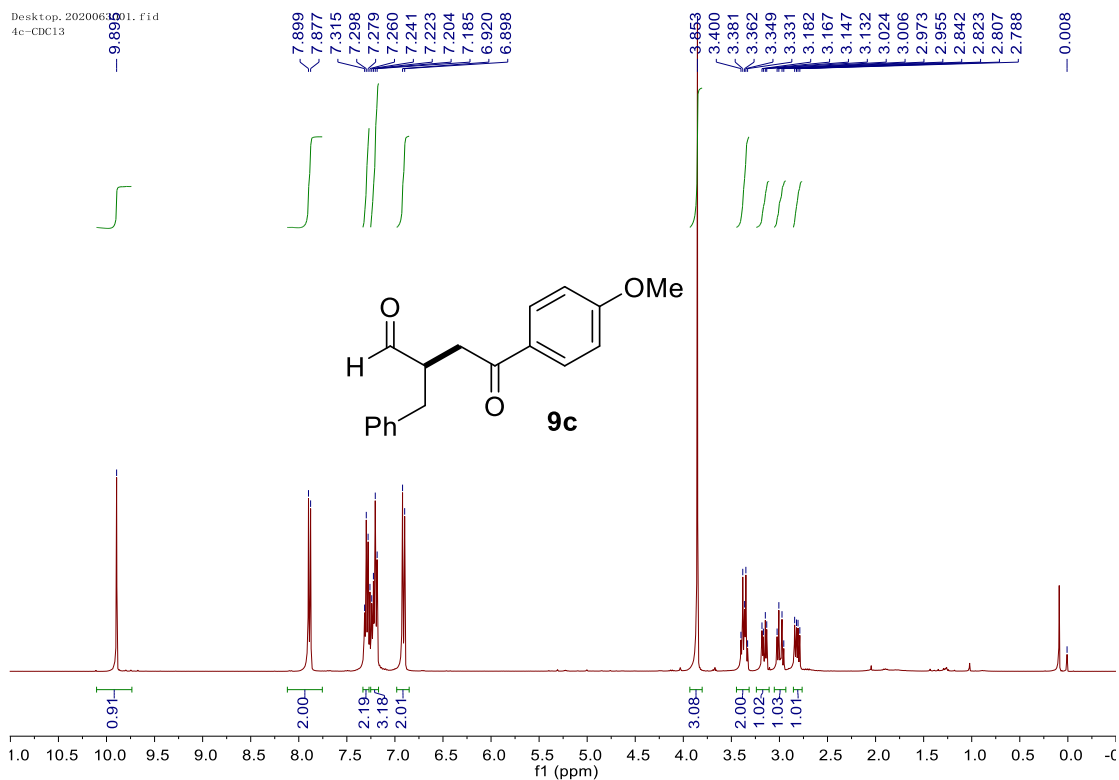

**Fig. S32** <sup>1</sup>H NMR of compound **9c** in CDCl<sub>3</sub>.

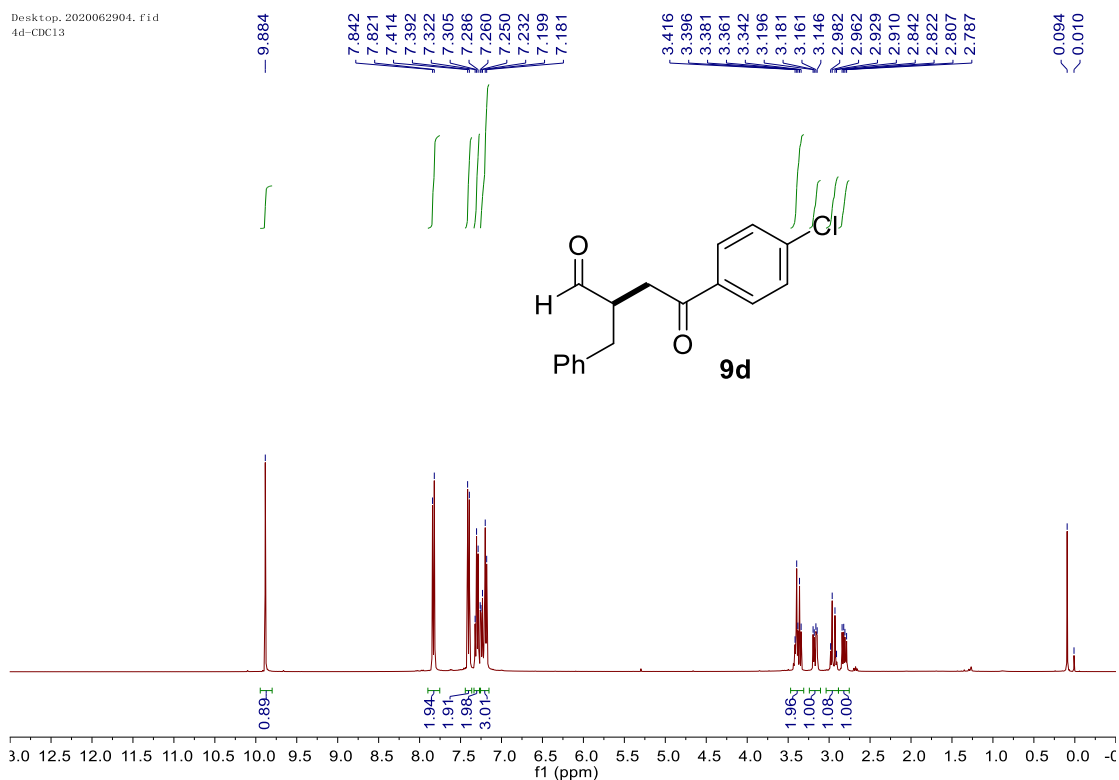

**Fig. S33** <sup>1</sup>H NMR of compound **9d** in CDCl<sub>3</sub>.

Desktop. 2021010801.fid  
6b+7a

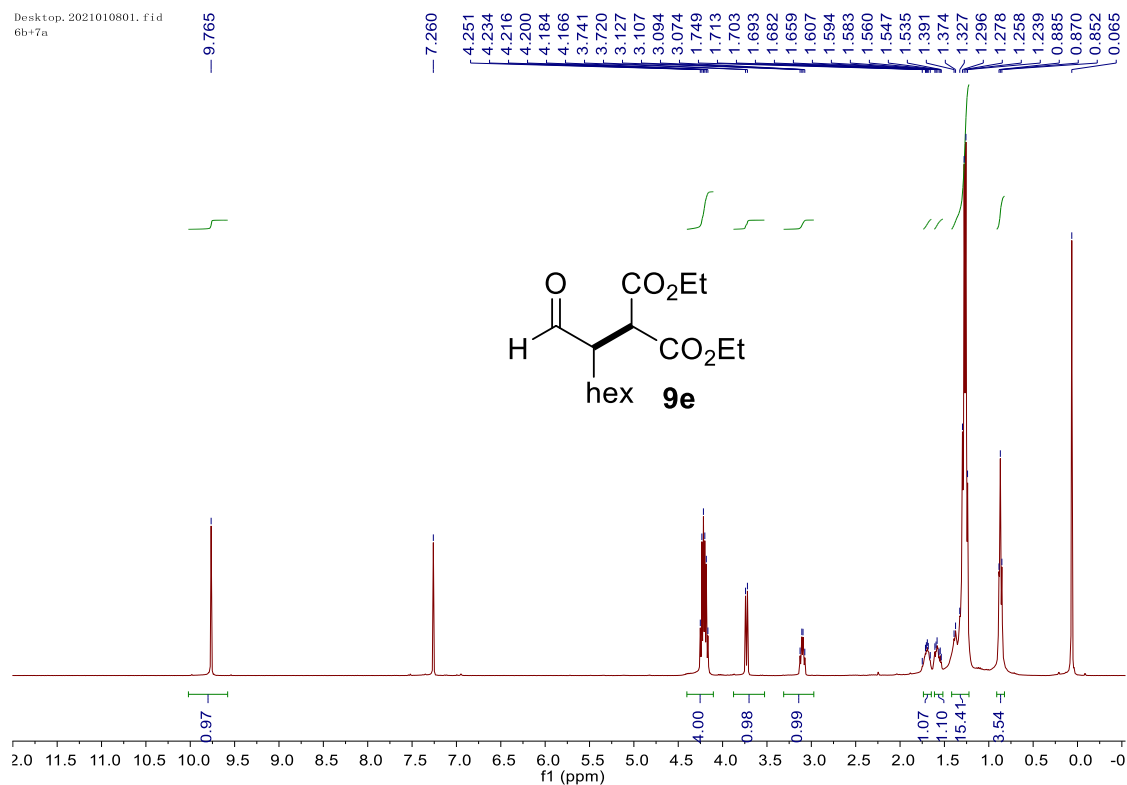

Desktop. 2020071105.fid  
4e-CDCl3

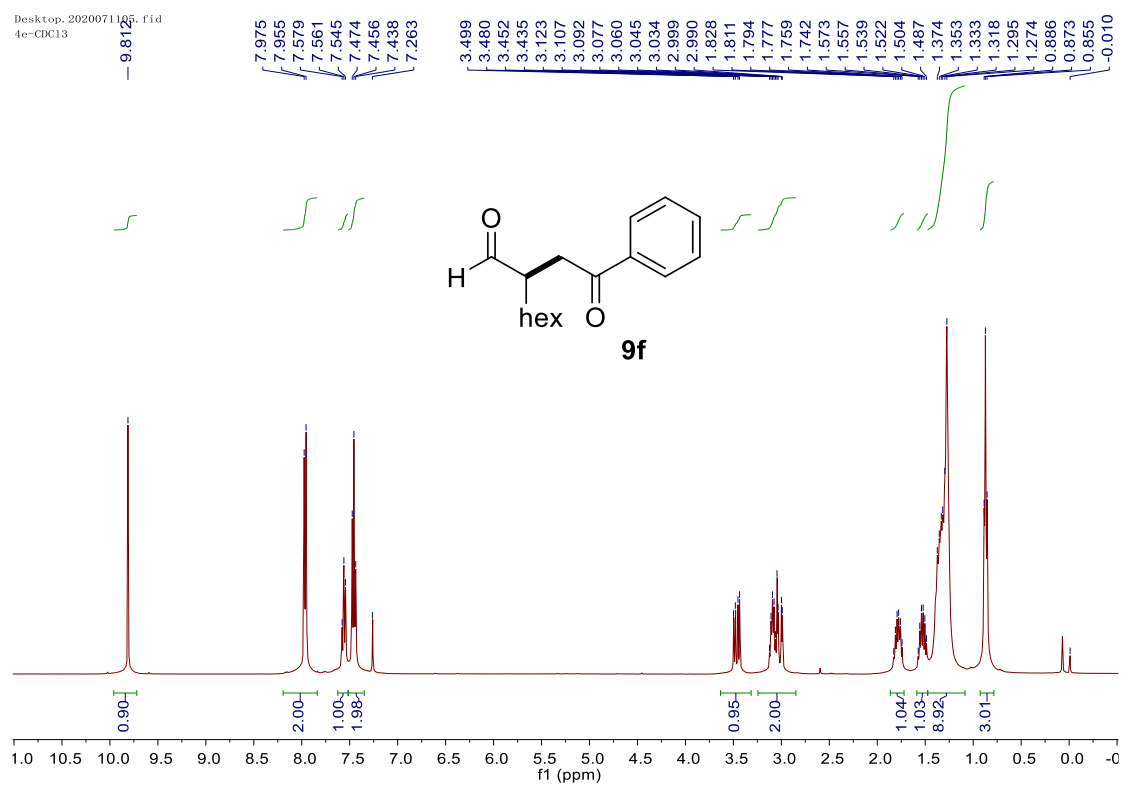



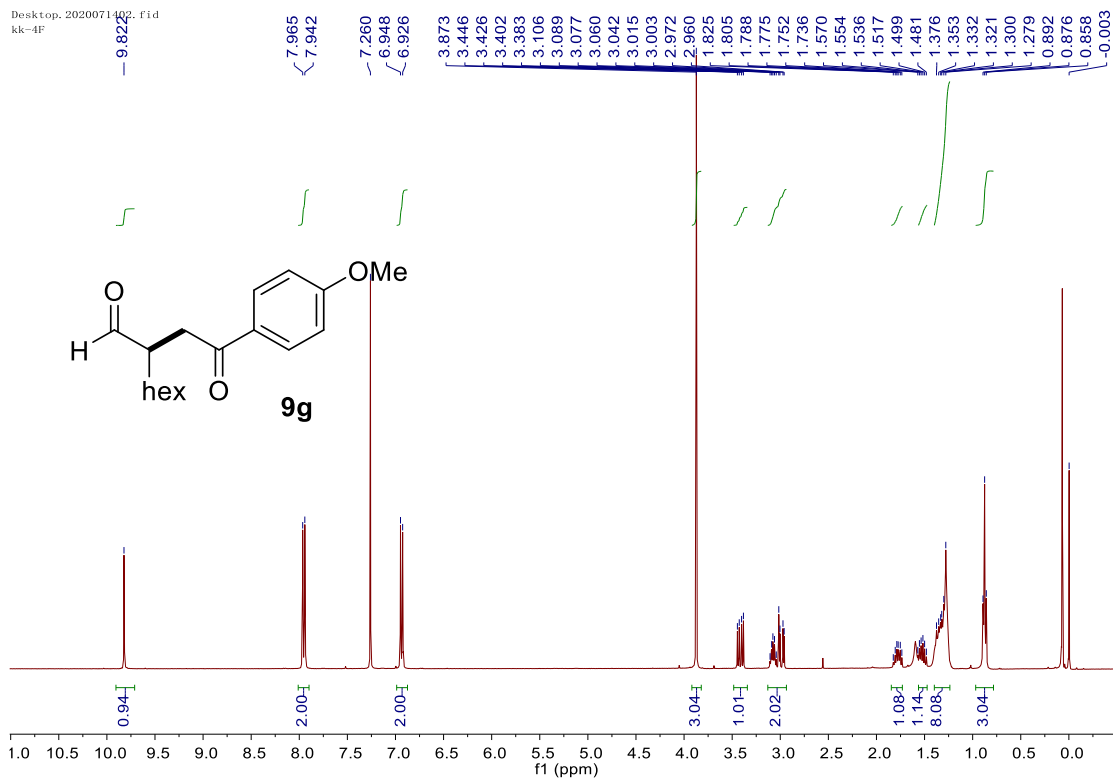

**Fig. S36**  $^1\text{H}$  NMR of compound **9g** in  $\text{CDCl}_3$ .

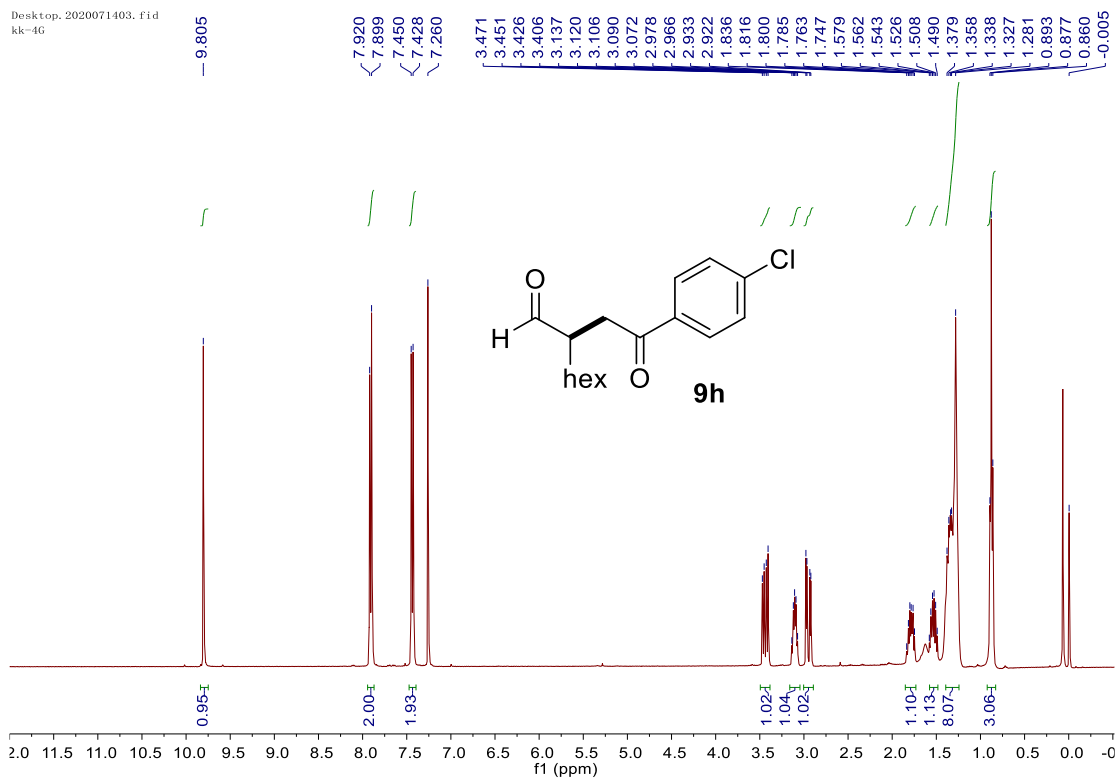

**Fig. S37**  $^1\text{H}$  NMR of compound **9h** in  $\text{CDCl}_3$ .

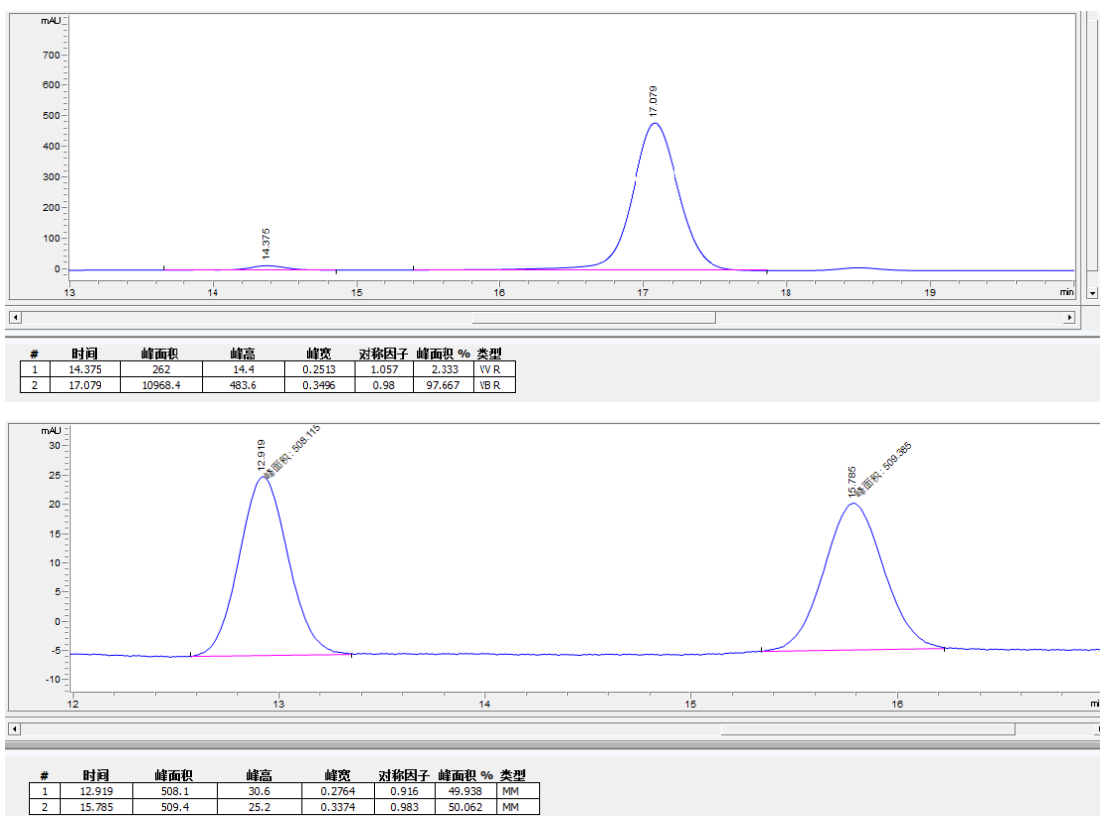

**Fig. S38** The enantiomeric excess of **9a** determined by chiral HPLC with IC column (hexane/isopropanol = 90/10; flow 1 mL·min<sup>-1</sup>).

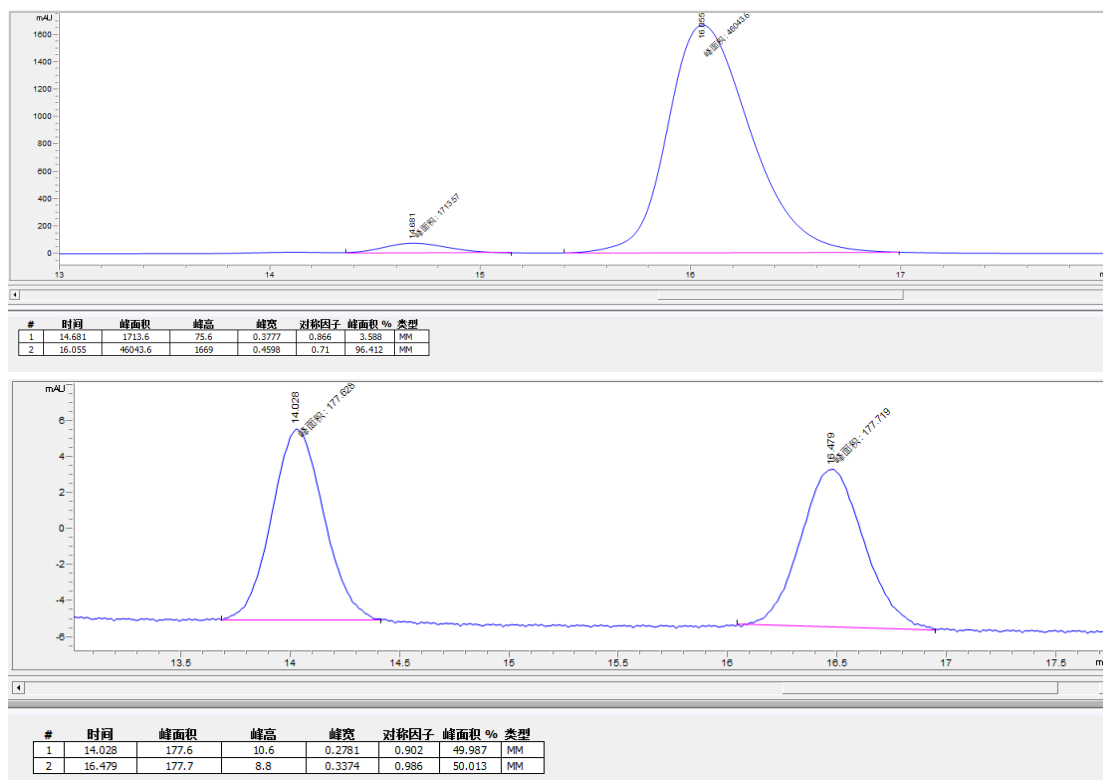

**Fig. S39** The enantiomeric excess of **9b** determined by chiral HPLC with IC column (hexane/isopropanol = 95/5; flow 1 mL·min<sup>-1</sup>).

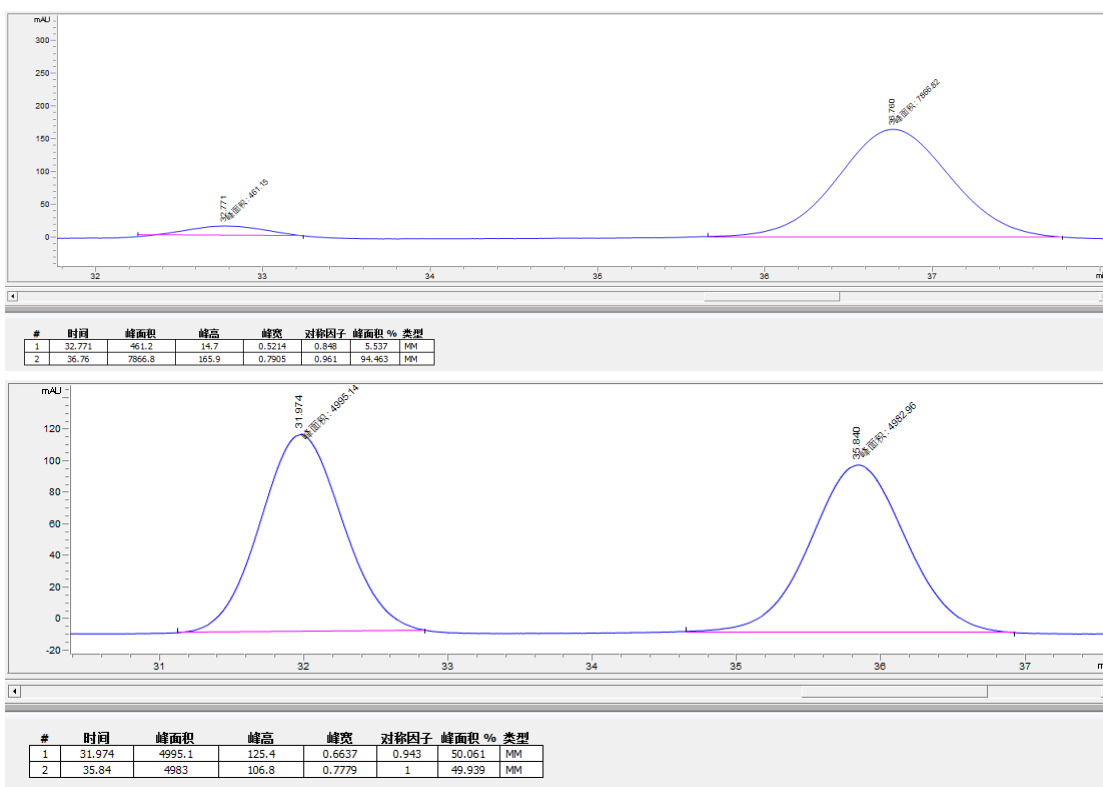

**Fig. S40** The enantiomeric excess of **9c** determined by chiral HPLC with IC column (hexane/iso38propanol = 90/10; flow 1 mL·min<sup>-1</sup>).

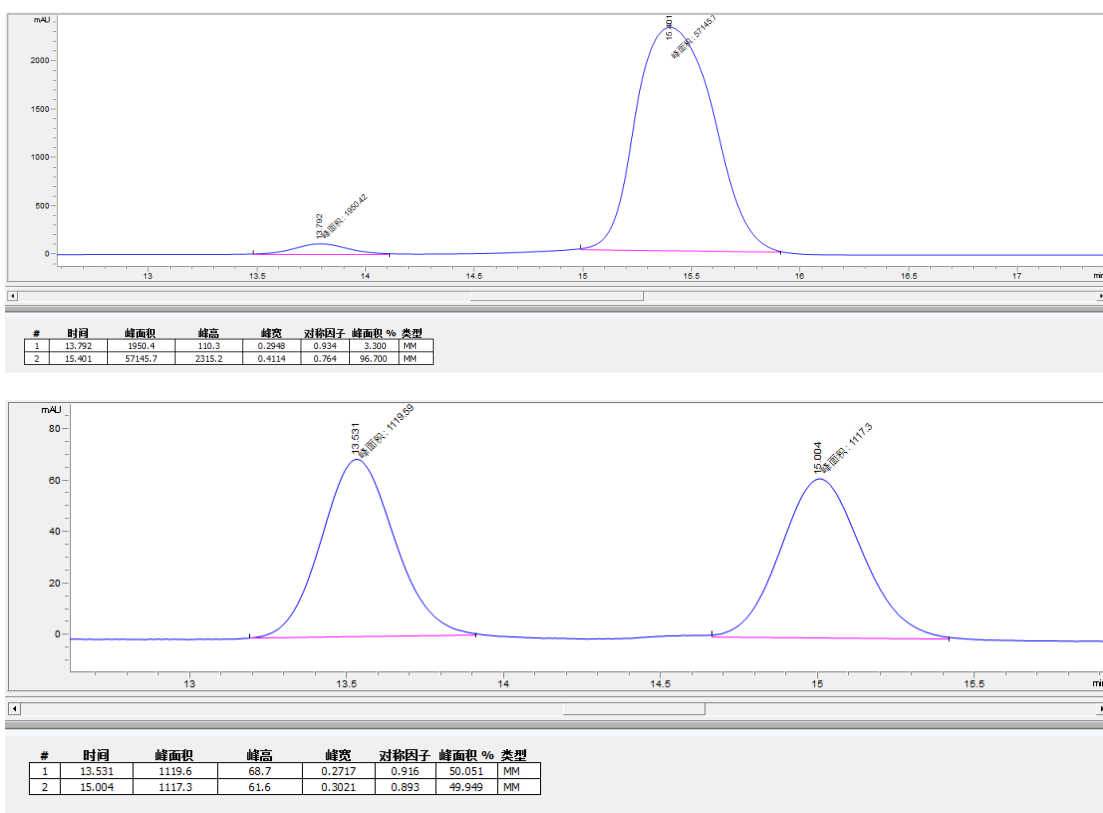

**Fig. S41** The enantiomeric excess of **9d** determined by chiral HPLC with IC column (hexane/isopropanol = 95/5; flow 1 mL·min<sup>-1</sup>).

Desktop. 2021011501.fid  
+

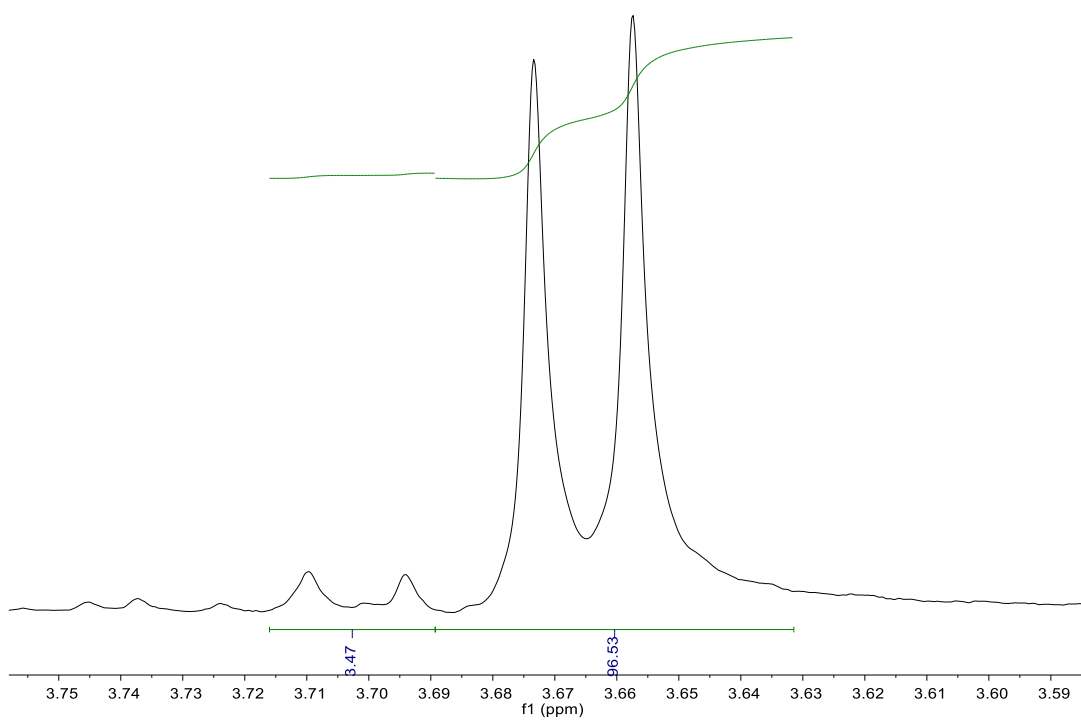

LHK. 2020011502.fid  
+

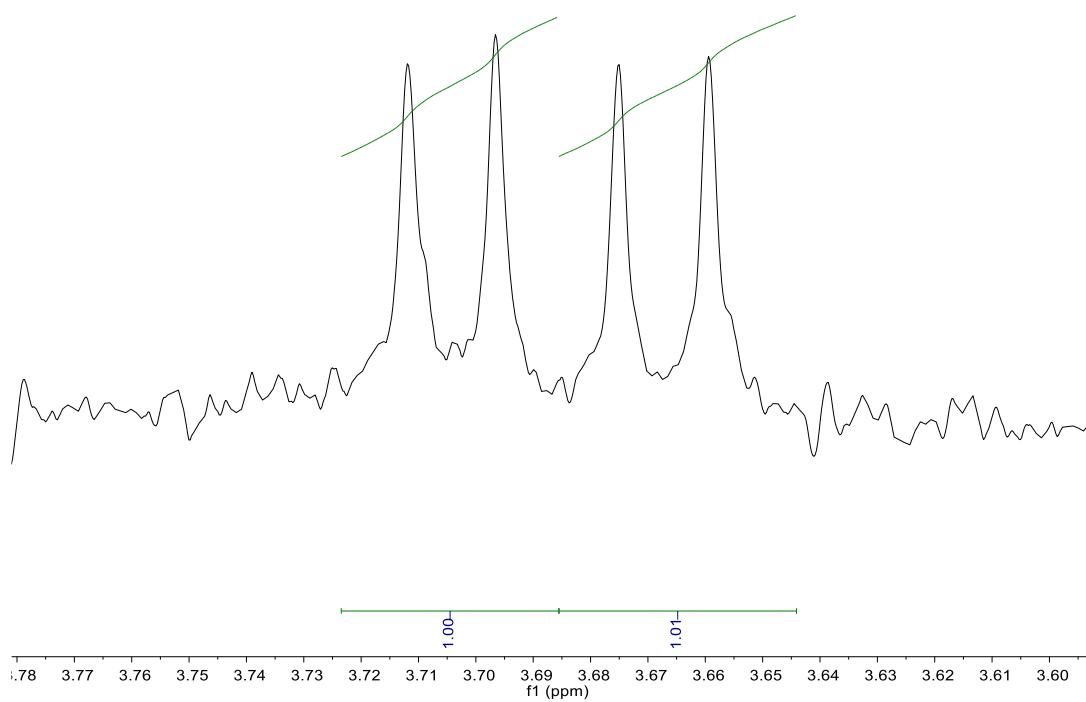

**Fig. S42** The enantiomeric excess of **9e** determined by  $^1\text{H}$  NMR in  $\text{CDCl}_3$ .

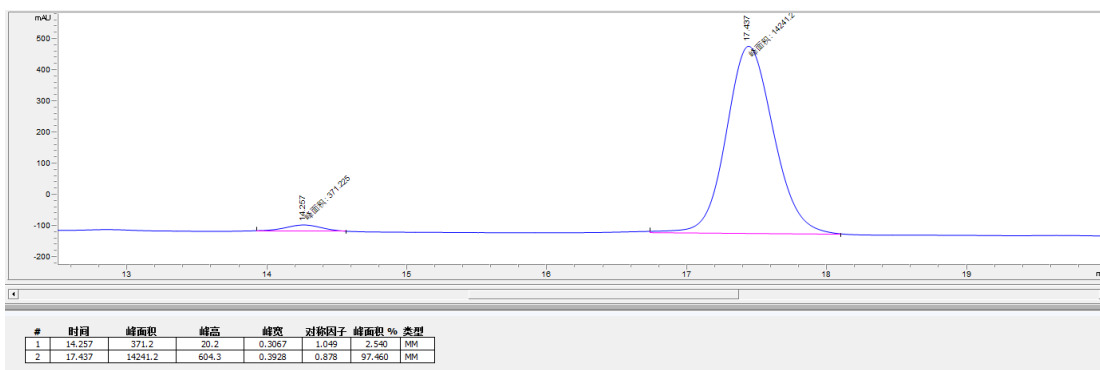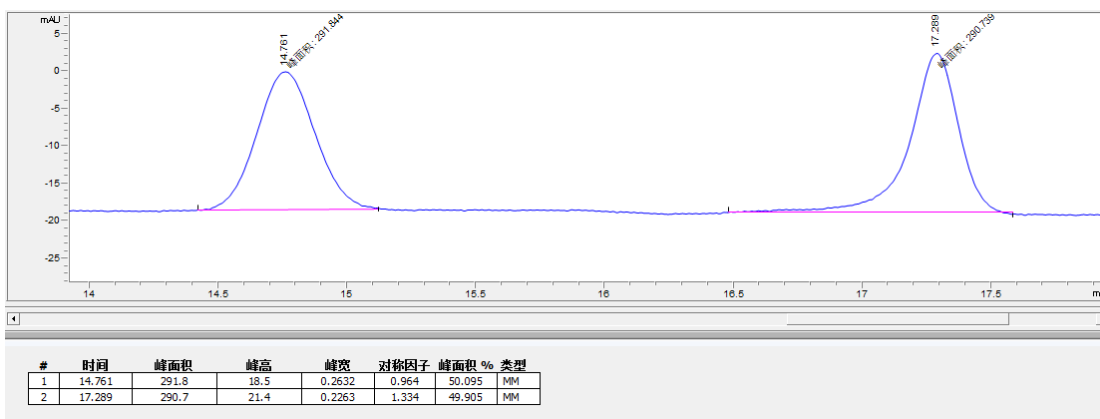

**Fig. S43** The enantiomeric excess of **9f** determined by chiral HPLC with IC column (hexane/isopropanol = 95/5; flow 1 mL·min<sup>-1</sup>).

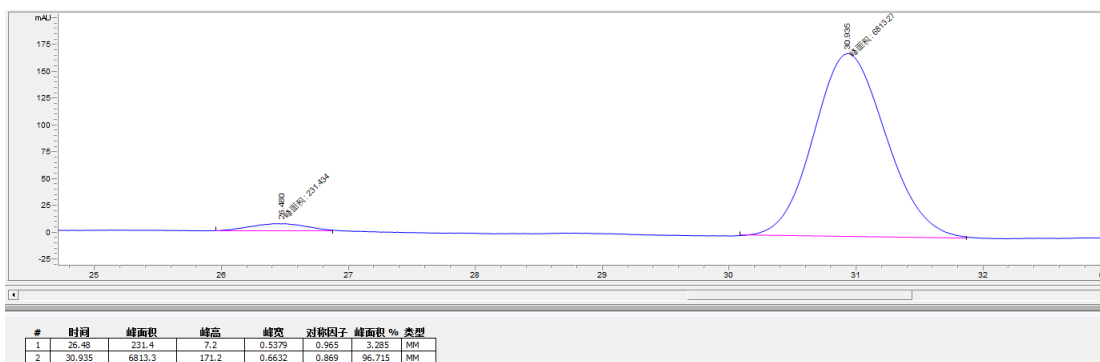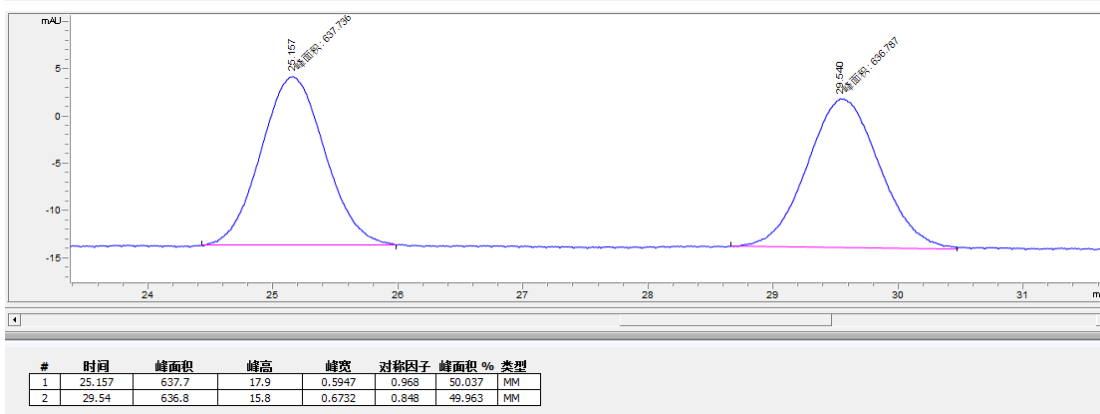

**Fig. S44** The enantiomeric excess of **9g** determined by chiral HPLC with IC column (hexane/isopropanol = 90/10; flow 1 mL·min<sup>-1</sup>).

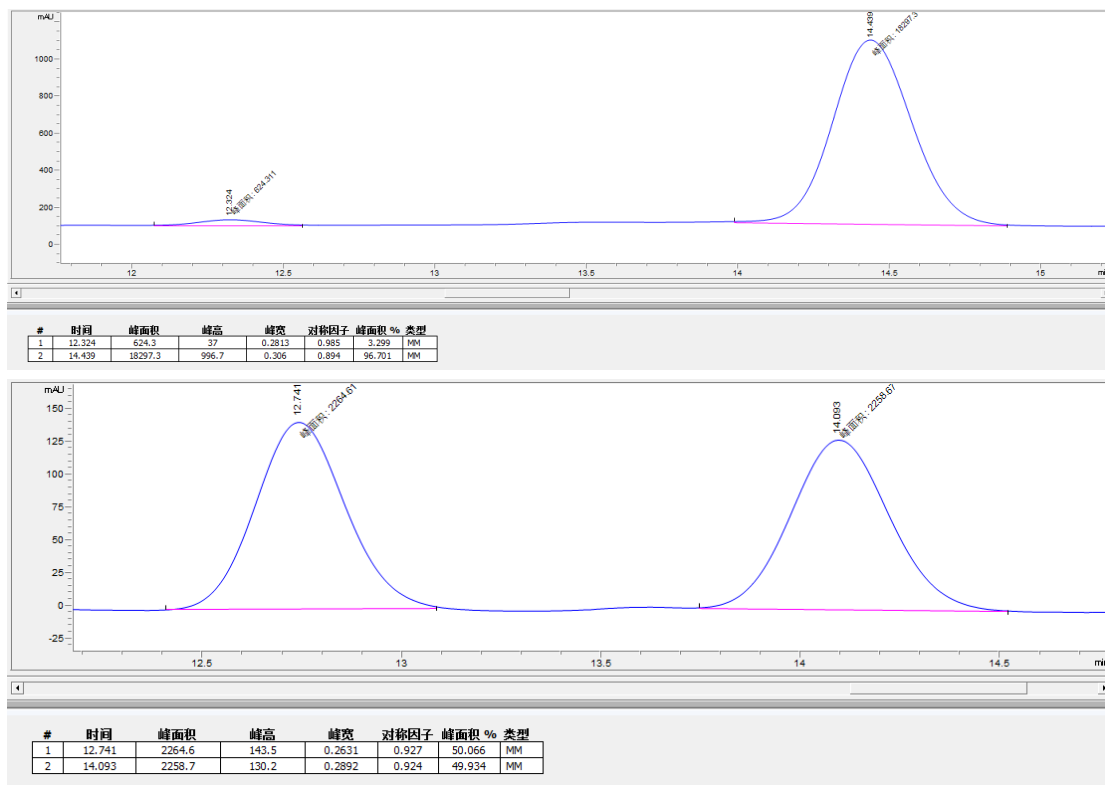

**Fig. S45** The enantiomeric excess of **9h** determined by chiral HPLC with IC column (hexane/isopropanol = 95/5; flow 1 mL·min<sup>-1</sup>).
